# 1 **Title**

2 Transcriptomic characterization of signaling pathways associated with osteoblastic  
3 differentiation of MC-3T3E1 cells

## 4 **Short Title**

5 Pathways analysis of osteoblast differentiation

## 6 **Authors**

7 Louis M. Luttrell<sup>1,2,3\*</sup>, Moahad S. Dar<sup>4</sup>, Diane Gesty-Palmer<sup>4</sup>, Hesham M. El-Shewy<sup>1</sup>,  
8 Katherine M. Robinson<sup>1</sup>, Courtney J. Haycraft<sup>5</sup>, Jeremy L. Barth<sup>6</sup>

## 9 **Affiliations**

10 <sup>1</sup> Department of Medicine, Medical University of South Carolina, Charleston, SC, USA

11 <sup>2</sup> Department of Biochemistry & Molecular Biology, Medical University of South  
12 Carolina, Charleston, SC, USA

13 <sup>3</sup> Ralph H. Johnson Veterans Affairs Medical Center, Charleston, SC, USA

14 <sup>4</sup> Department of Medicine, Duke University Medical Center, Durham, NC, USA

15 <sup>5</sup> Department of Biology, Mississippi College, Clinton, MS, USA

16 <sup>6</sup> Department of Regenerative Medicine and Cell Biology, Medical University of South  
17 Carolina, Charleston, SC, USA

## 18 **\* Corresponding Author**

19 E-mail: [luttrell@musc.edu](mailto:luttrell@musc.edu) (LML)

## 21 **Abstract**

22           Bone remodeling involves the coordinated actions of osteoclasts, which resorb the  
23 calcified bony matrix, and osteoblasts, which refill erosion pits created by osteoclasts to  
24 restore skeletal integrity and adapt to changes in mechanical load. Osteoblasts are  
25 derived from pluripotent mesenchymal stem cell precursors, which undergo  
26 differentiation under the influence of a host of local and environmental cues. To  
27 characterize the autocrine/paracrine signaling networks associated with osteoblast  
28 maturation and function, we performed gene network analysis using complementary  
29 “agnostic” DNA microarray and “targeted” NanoString™ nCounter datasets derived  
30 from murine MC3T3-E1 cells induced to undergo synchronized osteoblastic  
31 differentiation *in vitro*. Pairwise datasets representing changes in gene expression  
32 associated with growth arrest (day 2 to 5 in culture), differentiation (day 5 to 10 in  
33 culture), and osteoblast maturation (day 10 to 28 in culture) were analyzed using  
34 Ingenuity Systems™ Pathways Analysis to generate predictions about signaling pathway  
35 activity based on the temporal sequence of changes in target gene expression. Our data  
36 indicate that some pathways known to be involved in osteoblast differentiation, e.g.  
37 Wnt/ $\beta$ -catenin signaling, are most active early in the process, while others, e.g.  
38 TGF $\beta$ /BMP, cytokine/JAK-STAT and TNF $\alpha$ /RANKL signaling, increase in activity as  
39 differentiation progresses. Collectively, these pathways contribute to the sequential  
40 expression of genes involved in the synthesis and mineralization of extracellular matrix.  
41 These results provide insight into the temporal coordination and complex interplay  
42 between signaling networks controlling gene expression during osteoblast differentiation.  
43 A more complete understanding of these processes may aid the discovery of novel

44 methods to promote osteoblast development for the treatment of conditions characterized  
45 by low bone mineral density.

## 46 **Introduction**

47 Bone remodeling is the continuous process through which worn bone is removed  
48 and replaced [1, 2]. Bone-resorbing osteoclasts differentiate from hematopoietic stem  
49 cell precursors in response to cues originating from osteocytes, bone lining cells, and  
50 differentiating osteoblasts. Bone-forming osteoblasts derive from mesenchymal stem cell  
51 precursors and undergo a defined maturational sequence from proliferating preosteoblasts  
52 to mature synthetically active osteoblasts, before finally undergoing apoptosis or  
53 transforming into osteocytes embedded within the bony matrix and quiescent bone lining  
54 cells covering the mineralized surface. The bone remodeling cycle involves sequential  
55 osteoclastic bone resorption followed by the synthesis and mineralization of new bone  
56 matrix by osteoblasts, a process that requires several weeks to complete. Since these  
57 osteoclast-osteoblast bone forming units that mediate this process are constantly being  
58 created and destroyed, any analysis performed on bone tissue, whether by classical  
59 histomorphometry or using genomic and proteomic methods, is a ‘snapshot’ of the  
60 metabolic state of bone at that moment in time. While such *in vivo* studies are extremely  
61 useful for understanding the effects of disease, hormone administration/withdrawal or  
62 drug treatment on overall bone metabolism, they inevitably capture cross sectional data  
63 from multiple cell types in different differentiation states.

64 In contrast, *in vitro* studies offer the advantage that cellular development can be  
65 synchronized, offering a better opportunity to view differentiation as a linear process. In  
66 bone, the replication of undifferentiated osteogenic precursor cells, their recruitment to

67 remodeling bone matrix, and their subsequent acquisition of differentiated function,  
68 results from the complex interplay of signals transmitted by mechanical load, polypeptide  
69 growth factors, steroid and thyroid hormones, and locally produced cytokines and  
70 prostaglandins [3, 4]. While circulating hormones play an important modulatory role,  
71 osteoblastic differentiation can be induced *in vitro*, indicating that, once triggered, the  
72 process is autonomous, i.e. independent of ongoing exposure to systemically derived  
73 factors.

74         Gene array technology is a potentially powerful tool for understanding complex  
75 biological processes. A significant limitation of the approach, however, is that it is  
76 difficult to translate lists of significantly regulated genes into changes in biologically  
77 relevant signaling networks. Genomic datasets are invariably incomplete and contain  
78 some number of false positive ‘hits’, making candidate based follow up studies  
79 unreliable. In addition, important pathway components may not be regulated at the  
80 transcriptional level. Circumventing these limitations requires the use of bioinformatic  
81 approaches that compare changes in gene expression against databases of known protein-  
82 protein interactions to establish the probability that a given signaling or metabolic  
83 pathway is regulated under varying experimental conditions [5, 6]. These *in silico*  
84 analyses, which enable gene expression profile data to be expressed as the statistical  
85 probability that a particular pathway is regulated, can “fill in the blanks”, leading to a  
86 more holistic view of process-related changes in signaling pathway activity.

87         To better understand the temporal regulation of osteoblast differentiation, we  
88 performed microarray analysis of gene expression followed by signal transduction  
89 pathways analysis on murine MC3T3-E1 cells undergoing osteoblastic differentiation *in*

90 *vitro*. Taking advantage of their well-defined maturational sequence [7-10], we isolated  
91 RNA at four stages: during log growth, early and late osteoblastic differentiation, and  
92 mature synthetic function. We then performed pairwise comparisons to identify  
93 significant changes in gene expression associated with each of these stages of osteoblast  
94 development, and used the resulting genesets to identify the time-dependent changes in  
95 signal transduction pathway activity. Our data indicate that the temporally coordinated  
96 activation of signaling pathways known to be involved in osteoblast differentiation, e.g.  
97 Wnt/ $\beta$ -catenin, Transforming Growth Factor- $\beta$  (TGF $\beta$ ) Bone Morphogenic Protein  
98 (BMP), cytokine/Janus Kinase (JAK)-Signal Transducer and Activator of Transcription  
99 (STAT), and Tumor Necrosis factor- $\alpha$  (TNF $\alpha$ )/Receptor Activator of Nuclear Factor  $\kappa$ -  
100 B (NF $\kappa$ B) Ligand (RANKL) signaling, correlates with the sequential expression of genes  
101 involved in the biosynthesis and mineralization of extracellular matrix as differentiation  
102 progresses. These results demonstrate the utility of functional genomic approaches to  
103 microarray analysis and offer insight into the temporal sequence of changes in the  
104 autocrine/paracrine signaling networks regulating osteoblast differentiation.

## 105 **Materials and methods**

### 106 **Culture and differentiation of MC3T3-E1 cells**

107 Stock cultures of MC3T3-E1 cells (subclone 4; CRL-2593; ATCC) were  
108 maintained in  $\alpha$ -minimum essential medium (MEM) supplemented with 10% v/v fetal  
109 bovine serum, penicillin (100 units/mL) and streptomycin (100 pg/mL) in a humidified  
110 10% CO<sub>2</sub> atmosphere at 37 °C. Until the time of study cells were maintained in log phase  
111 growth by passage every 3-5 days using 0.001% pronase (w/v) to detach adherent cells.  
112 For studies of the temporal sequence of osteoblast differentiation, cells were plated at an

113 initial density of 20,000 cells/well in 6-well plates or 100,000 cells/dish in 10 cm dishes,  
114 and grown for 2 to 28 days in  $\alpha$ -MEM supplemented with 10% v/v fetal bovine serum, 5  
115 mM  $\beta$ -glycerol phosphate and 50  $\mu$ g/mL ascorbic acid (7-10).

## 116 **Cell replication**

117 Between days 1 and 5 in culture, cells in 6-well plates were treated with 0.001%  
118 pronase (w/v) to achieve detachment and directly counted in a hemocytometer.

## 119 **Alkaline phosphatase activity**

120 Alkaline phosphatase activity was measured by para-nitrophenyl phosphate  
121 hydrolysis as previously described (11). Briefly, MC3T3-E1 cells growth in 6-well plates  
122 were harvested in distilled water and disrupted by sonication. Appropriately diluted  
123 aliquots of cell lysate containing equal cell protein were incubated for 30 min at 37 °C in  
124 a final reaction volume of 600  $\mu$ L, containing 1.0 M diethanolamine, pH 10.3 and 15  
125 mM para-nitrophenyl phosphate. Reactions were terminated by the addition of 2.4 mL  
126 0.1N NaOH, after which generation of para-nitrophenol was measured by determining  
127 absorbance at 400 nm. Results were expressed as pmol para-nitrophenol/min/ $10^6$  cells.

## 128 **Synthesis of type I collagen**

129 Type 1 collagen production was determined by western blotting. Monolayers of  
130 MC3T3-E1 cells were lysed directly in 1X Laemmli sample buffer, dispersed by  
131 sonication, and resolved by sodium dodecyl sulfate – polyacrylamide gel electrophoresis.  
132 Immune complexes on nitrocellulose membranes were detected using mouse monoclonal  
133 anti-type I collagen IgG<sub>1</sub> (COL1A: sc59772; Santa Cruz Biotechnology, Santa Cruz, CA)  
134 with horseradish peroxidase-conjugated donkey anti-mouse IgG (Code: 715-035-150;

135 Jackson ImmunoResearch Laboratories Inc., West Grove, PA) as secondary antibody.  
136 The cell content of each sample was determined by western blotting in parallel for  $\alpha$ -actin  
137 using mouse monoclonal anti-actin IgG<sub>1</sub> (C-2: sc8432; Santa Cruz Biotechnology, Santa  
138 Cruz, CA). Immune complexes were visualized on X-ray film by enzyme-linked  
139 chemiluminescence and quantified using a Fluor-S MultiImager. Data were expressed as  
140 the ratio of type I collagen to  $\alpha$ -actin in each sample.

### 141 **Alizarin red staining**

142 Matrix mineralization was quantified by Alizarin red staining as described (12).  
143 Monolayers of MC3T3-E1 cells in 6-well plates were fixed for 24 hr in a 10%  
144 formalin:methanol:distilled water solution (1:1:1.5), stained for 20 min in 2% Alizarin  
145 Red-S in distilled water, washed with distilled water and air dried. Mineralization was  
146 quantified by eluting the stain using 10% cetylpyridium chloride and measuring  
147 absorbance at 520 nM.

### 148 **mRNA isolation**

149 MC3T3-E1 cells were cultured as described in 10 cm dishes for 2, 5, 10 or 28  
150 days prior to isolation of RNA. Total RNA from three independent cultures was isolated  
151 at each time point. Cells were harvested by scraping and RNA was isolated with Trizol  
152 Reagent (Invitrogen, Carlsbad, CA) and purified using the RNeasy kit (Qiagen Inc.,  
153 Valencia, CA) according to the manufacturer's protocols (13). Total RNA was analyzed  
154 for concentration (ng/ $\mu$ L) and purity (ratios of 260/280 nm and 260/230 nm) using a  
155 NanoDrop 1000 Spectrophotometer (Thermo Scientific, Wilmington, DE). RNA integrity  
156 was analyzed using the Experion RNA HighSens Analysis Kit (Bio-Rad Laboratories  
157 Inc., Hercules CA).

## 158 **Microarray analysis**

159 Samples underwent RNA amplification (Message Amp; Ambion, Austin, TX),  
160 labeling with Cy3, and hybridization to Mouse Operon 17,000 gene feature (Operon  
161 dataset; version 2.0) spotted oligonucleotide arrays in the microarray facility of the Duke  
162 University Institute for Genome Sciences and Policy ([www.genome.duke.edu/cores/  
163 microarray/](http://www.genome.duke.edu/cores/microarray/)). MIAME compliant microarray data files have been deposited with the  
164 NCBI GEO database ([www.ncbi.nlm.nih.gov/gds](http://www.ncbi.nlm.nih.gov/gds)) (GEO Series GSE64485). Data pre-  
165 processing and normalization were performed on GenePix scan results files (.gpr files)  
166 using the Bioconductor LimmaGUI package 1.28.0 run with R 2.13.0 software (14).  
167 Background correction was performed using the normexp method with offset of 16, and  
168 spot quality weighting was applied as follows: 1 for Good (100) or Unflagged (0); 0.1 for  
169 Bad (-100), Not Found (-50) and Absent (-75) flags. Print-tip group loess normalization  
170 was applied for normalization within arrays. Review of box plots of normalized M  
171 values indicated that normalization between arrays was not warranted. Normalized M  
172 values, i.e.  $\log_2 \text{test}(\text{Cy3})/\text{reference}(\text{Cy5})$  relationship, were imported into dchip for  
173 comparative analysis. ANOVA was used to find genes differing as function of time, i.e.  
174 significantly different between any two time points. ANOVA filtering at the 0.005 level  
175 yielded 1005 genes passing with a reasonable 5-10% false discovery rate (17664  
176 compared; expected false positive: 88). Self-organizing maps (SOM) were used to  
177 partition the significantly regulated genes into different response patterns. Expression  
178 data were imported into MeV software for SOM analysis, z-standardization performed,  
179 i.e. mean=0 and SD=1, and SOM clusters for ANOVA  $p < 0.005$  were generated by: 16



180 clusters, 4x4, 2000 iterations, hexagonal topography, Gaussian neighborhood, alpha 0.05,  
181 radius 1.0, no HCL linkage, Pearson correlation.

## 182 **NanoString™ nCounter analysis**

183       The NanoString™ nCounter gene expression system (NanoString™  
184 Technologies; Seattle, WA) was used for expression profiling of selected mRNA species  
185 isolated from MC3T3-E1 cells at Days 2, 5, 10 and 28 in culture using a custom nCounter  
186 CodeSet composed of 243 probes (S1 Table) including 6 housekeeping controls (Eif4a2,  
187 GusB, Oaz1, Stk36, Tceb1, and Tubb4a). With NanoString™ technology fluorescent  
188 single strand RNA probes are hybridized to complimentary target strands of mRNA and  
189 quantified based on the fluorescence of each target gene within each sample (15,16).  
190 Briefly, the NanoString™ reporter probe CodeSet was suspended in 70µL of  
191 hybridization buffer and 8µL aliquots were combined in sterile microfuge tubes with  
192 each RNA sample diluted to a concentration of 250ng RNA in 5µL. Thereafter, 2µL of  
193 the capture probe CodeSet was added to each tube, tubes were centrifuged, and then  
194 incubated at 65°C in a BioRad T100 Thermal Cycler (BioRad; Hercules, CA) for 13-15  
195 hours. After hybridization, samples were analyzed using the NanoString™ Technologies  
196 Prep Station and Digital Analyzer according to manufacturer's instructions. All 12  
197 samples, i.e. RNA from triplicate cultures at each of four time points, were analyzed  
198 simultaneously to minimize batch effects. The resulting counts were analyzed using  
199 NanoStriDE and GraphPad Prism 7 (GraphPad Software; Carlsbad, CA) software.  
200 Statistical significance of change over time was determined by two-way ANOVA with  
201 Tukey's multiple comparisons test using GraphPad Prism 7.

## 202 **IPA metabolic pathways analysis.**

203 Network analysis of genesets representing changes in mRNA abundance  
204 between specified time points was performed using the Ingenuity Systems™ Pathways  
205 Analysis (IPA) tool (Qiagen; Redwood City, CA). IPA compares Genbank Accession  
206 number/expression information with a proprietary protein-interaction database to  
207 establish the probability that a given signaling or metabolic pathway is activated under  
208 varying experimental conditions. For the microarray dataset, expression ratios for all  
209 relevant pairwise comparisons, i.e. D2 vs D5, D2 vs D10, D2 vs D28, D5 vs D10, D5 vs  
210 D28, and D10 vs D28, were calculated using the ANOVA  $p < 0.005$  set of 1005  
211 significantly regulated genes. For the NanoString™ dataset, pairwise expression ratios  
212 were calculated for each of the 237 measurable genes. Expression ratio data were  
213 uploaded into the IPA Pathways Analysis system (<https://analysis.ingenuity.com/>),  
214 yielding 976 analyzable transcripts from the microarray dataset (S2 Table). Each dataset  
215 was subjected to IPA Core Analysis, then analyzed using IPA Upstream Regulator,  
216 Downstream Effects, and Canonical Pathways analytic tools. To capture pathway  
217 changes associated with each phase of differentiation we focused on the D2 vs D5, D5 vs  
218 D10, and D10 vs D28 pairwise comparisons. For IPA Upstream Regulator and Canonical  
219 Pathways analysis, gene clusters composed of  $\geq 2$  genes per group with  $P < 0.05$   
220 enrichment, i.e.  $-\log(p\text{-value}) \geq 1.3$ , compared with a standard murine background  
221 database were considered analyzable. The IPA output was exported as Microsoft Excel  
222 files to prepare the S3-7 Tables. Graphic representations of the data were prepared using  
223 either the IPA Canonical Pathways Molecular Activity Predictor tool or GraphPad Prism  
224 7 software, as appropriate. To facilitate visual inspection of the changes in predicted  
225 Upstream Regulator and Canonical Pathways activity associated with each interval, heat

226 maps were generated from the activation z-scores using Morpheus software

227 (<https://software.broadinstitute.org/morpheus/>).

## 228 **Results**

### 229 **The temporal sequence of MC3T3-E1 cell differentiation**

230 MC3T3-E1 cells undergo a well-characterized process of osteoblastic  
231 differentiation when placed in culture medium supplemented with  $\beta$ -glycerol phosphate  
232 and ascorbic acid [7-10]. Fig 1 presents this process tracked using traditional markers:  
233 cell number, bone alkaline phosphatase, abundance of type I collagen, and alizarin red  
234 staining. After initial seeding, the cells remain in log phase growth for 2-3 days,  
235 undergoing growth arrest upon attaining confluence by days 3-4. Osteoblastic  
236 differentiation begins upon growth arrest and continues through days 5 to 10 in culture,  
237 evident first as an increase in the production of bone-specific alkaline phosphatase,  
238 followed by deposition of a collagenous matrix composed in part of type 1 collagen.  
239 Matrix mineralization begins as early as day 10 and accelerates with time in culture. By  
240 day 28 the MC3T3-E1 derived osteoblasts have produced a mineralized matrix.

241

242 **Fig 1. MC3T3-E1 osteoblast maturation *in vitro*.** MC3T3-E1 cells were seeded in 6-  
243 well tissue culture plates at an initial density of 20,000 cells/well and maintained in  
244 culture for up to 28 days. **A.** Representative Alizarin Red stained culture dishes from  
245 Days 2, 5, 10 and 28 demonstrating the progression of matrix mineralization. **B.** Graph  
246 depicting change in cell number (days 1-5), secreted alkaline phosphatase activity (days  
247 4-28), type 1 collagen synthesis (days 3-21), and matrix mineralization (days 4-28)  
248 associated with MC3T3-E1 differentiation. Data shown are the Mean  $\pm$  SEM of triplicate

249 determinations. These data were used to select time points representing proliferating  
250 preosteoblasts (day 2), early and late differentiating osteoblasts (days 5 and 10), and  
251 active osteoblasts (day 28), for subsequent mRNA isolation.

252

253 Predictably, osteoblastic differentiation on MC3T3-E1 cells is reflected in  
254 changes in the abundance of mRNA encoding bone marker proteins. As shown in Fig 2,  
255 osteoblast developmental markers, matrix components, and proteins involved in cell  
256 adhesion and matrix remodeling change over time as the cells evolve from proliferating  
257 pre-osteoblasts to mature osteoblasts. Notably, these changes in mRNA abundance  
258 appear at different times during development. mRNA encoding Runx2, the first  
259 transcription factor required for determination of the osteoblast lineage [17,18], increases  
260 early in development and plateaus between Days 5 and 10, while others, e.g. alkaline  
261 phosphatase (*Alpl*), integrin-binding sialoprotein (*Ibsp*), a major structural protein of the  
262 bone matrix, and parathyroid hormone receptor (*Pthr1*), increase steadily from Day 2 to  
263 Day 28. Still other mRNA species are abundant throughout development, e.g. collagen  
264 type 1A (*Colla1*), and some increase between Days 10 and 28 after differentiation is well  
265 underway e.g. the osteoblast-specific matrix protein periostin (*Postn*). Such differences  
266 are consistent with a temporally coordinated process wherein early events trigger the  
267 sequential activation of a transcriptional program driven by intracellular signaling  
268 networks.

269

270 **Fig 2. Temporal changes in the abundance of mRNA encoding bone marker**  
271 **proteins.** Total RNA was isolated from triplicate cultures of MC3T3-E1 cells at Days 2,

272 5, 10 and 28 in culture, and mRNA abundance quantified by NanoString nCounter using  
273 a bone focused probe set (S1 Table). Developmental markers shown are: alkaline  
274 phosphatase (*Alpl*); parathyroid hormone receptor (*Pthr1*); the transcription factors  
275 *Runx2*, *Sox9* and *Sp7*; and the transcriptional repressor *Msx2*. Matrix components shown  
276 are: bone gamma-carboxyglutamate protein (*Bglap*); collagen types 1A1 (*Colla1*), 1A2  
277 (*Colla2*), 2A1 (*Col2a1*) and 10A1 (*Col10a1*); decorin (*Dcn*); dermatopontin (*Dpt*);  
278 dentin matrix protein-1 (*Dmp-1*); integrin-binding sialoprotein (*Ibsp*); and periostin  
279 (*Postn*). Proteins associated with cell adhesion and matrix remodeling are: tetraspanin  
280 (*Cd9*); cathepsin K (*Ctsk*); osteonectin (*Sparc*); osteopontin (*Spp1*); matrix  
281 metalloproteinases 2 (*Mmp2*), 14 (*Mmp14*), and 16 (*Mmp16*); hyaluronic acid receptor  
282 (*Cd44*); and neural cell adhesion molecule 1 (*Cd56*). Data shown represent the Mean  $\pm$   
283 SD of triplicate samples. Error bars not shown are smaller than the symbol. † P < 0.05; \*  
284 P < 0.01; \*\* P < 0.001 different in abundance between at least two time points by two-  
285 way ANOVA with Tukey's multiple comparisons test; ns, not significant.

286

## 287 **DNA microarray analysis of MC3T3-E1 differentiation**

288 DNA microarrays, because they capture information about the abundance of a  
289 large number of unselected mRNA species, provide an “agnostic” snapshot of gene  
290 expression patterns at a given point in time. Combining microarray data on changes in  
291 mRNA abundance over time with bioinformatic tools, such as Ingenuity Systems™ IPA,  
292 provides a means to translate microarray data into a more complete picture of metabolic  
293 activity [5, 6]. To identify changes in gene expression occurring at different stages of  
294 differentiation, triplicate samples of total mRNA were isolated from subconfluent

295 MC3T3-E1 preosteoblasts (day 2), growth-arrested preosteoblasts (day 5), differentiating  
296 osteoblasts (day 10) and maturing synthetically-active osteoblasts (day 28), and  
297 hybridized to Operon V2.0 murine cDNA microarrays representing approximately 17,600  
298 expressed sequence tags. Raw microarray data (GEO Series GSE64485) were analyzed  
299 by ANOVA to identify genes whose mean expression was significantly different between  
300 any two time points. Fig 3A shows a heat map of 1005 mRNAs passing the ANOVA  
301 filtered at  $p < 0.005$ . S2 Table lists the gene symbol, annotation, and observed abundance  
302 of the 976 analyzable mRNAs from this dataset. Hierarchical clustering revealed several  
303 distinct temporal patterns of expression, with some gene clusters increasing or decreasing  
304 in abundance early in differentiation, others changing progressively throughout  
305 differentiation, or changing most dramatically during the period of osteoblast maturation.  
306 Still others genes exhibited a biphasic pattern, increasing or decreasing with the onset of  
307 differentiation and reversing their direction of change between days 10 and 28 in culture.  
308 To further partition genes into different response patterns, we generated self-organizing  
309 maps (SOM) from the ANOVA  $p < 0.005$  dataset. As shown in Fig 3B, distinct temporal  
310 patterns of mRNA abundance were evident, reflecting each stage of osteoblast  
311 differentiation.

312

313 **Fig 3. Temporal patterns of change in the MC3T3-E1 transcriptome during**  
314 **differentiation.** Triplicate DNA microarrays at each time point were used to identify  
315 significantly regulated mRNAs at different phases of osteoblast differentiation by  
316 ANOVA ( $p < 0.005$ ; estimated false discovery rate 8.8%). **A.** Heat map representing  
317 observed mRNA abundance of 1005 genes identified by ANOVA as demonstrating a

318 significant difference between any two time points. Hierarchical clustering was used to  
319 identify coordinated patterns of change. **B.** Sixteen cluster SOM representing temporal  
320 changes in mRNA abundance associated with MC3T3-E1 differentiation. Expression  
321 data were subjected to z-standardization and SOM assembled using MeV software. The  
322 resulting 16 SOM clusters are shown grouped in relation to the differentiation state of  
323 MC3T3-E1 cells. Growth arrest was associated with abrupt changes (increase or  
324 decrease) in mRNA levels between days 2 and 5 (240 genes). The onset of differentiation  
325 was associated with progressive changes in mRNA levels between days 2 and 10 (212  
326 genes). Peak differentiation was associated with prominent changes in mRNA levels  
327 between days 5 and 10 (246 genes). Osteoblast maturation was associated with prominent  
328 changes in mRNA levels between days 10 and 28 (307 genes).

329

330 To test the hypothesis that the biological processes underlying osteoblastic  
331 differentiation of MC3T3-E1 cells are reflected in the coordinated changes in the  
332 transcriptome over time, the DNA microarray data were analyzed using Ingenuity  
333 Systems™ IPA software. IPA compares empirically derived “omics” datasets, e.g. DNA  
334 microarray data, with a curated database of reported gene-gene and protein-protein  
335 interactions to predict signaling pathway activity based on observed changes in upstream  
336 regulators and/or the downstream genes whose expression they control. The IPA output  
337 includes two statistical measures. The first, which is typically expressed as  $-\log(p$ -  
338 value), represents the probability that the correlation between an input set of observed  
339 factors and co-regulated genesets in the IPA database did not occur by chance. Hence, a  
340  $-\log(p$ -value) greater than 1.3 represents  $p < 0.05$  of a significant association. The

341 second, termed an activation z-score, is based on the degree to which observed changes in  
342 factor levels, e.g. increases or decreases in mRNA abundance between two points in time,  
343 correlate with the expected changes associated with pathway activation or inhibition.  
344 Thus, an activation z-score  $> 2$  or  $< -2$  predicts pathway activation or inhibition,  
345 respectively, with  $p < 0.05$ .

346 The biochemical characterization of differentiating MC3T3-E1 cells (Fig 1)  
347 demonstrates that the major downstream biological processes, e.g. cell proliferation  
348 versus matrix mineralization, change over time. To generate a gestalt view of whether  
349 the structure of the DNA microarray dataset reflects this temporal evolution, we  
350 calculated expression ratios for each of the 976 analyzable genes identified by ANOVA  
351 using three pairwise comparisons, day 2 to day 5 (D2 vs D5), day 5 to day 10 (D5 vs  
352 D10), and day 10 to day 28 (D10 vs D28), and performed IPA Downstream Effects  
353 Analysis, which predicts increases or decreases in downstream biological activities. S3  
354 Table lists the annotation,  $-\log(p\text{-value})$ , and activation z-score for all biological process  
355 terms identified from our dataset where the z-score was  $> 1$  or  $< -1$ . These results are  
356 presented graphically in Fig 4. As shown, each pairwise comparison was associated with  
357 a set of unique of terms, here represented graphically as vertical bars. Importantly, terms  
358 identified in two overlapping comparisons exhibited a high degree of concordance in the  
359 predicted direction of activation/inhibition (20 of 26 terms appearing in both the D2 vs  
360 D5 and D5 vs D10 comparison, and 24 of 31 terms appearing in both the D5 vs D10 and  
361 the D10 vs D28 comparison). Consistent with the SOM analysis (Fig 3B), where some  
362 gene clusters increased in abundance steadily throughout differentiation, several process  
363 level terms were identified in all three genesets, and again there was strong concordance



364 in the predicted direction of activation/inhibition (20 of 23 terms appearing in all three  
365 comparisons). Of interest, process terms appearing only in the D2 vs D5 and D10 vs D28  
366 comparisons showed less concordance (only 9 of 29 terms were concordant). This too  
367 may reflect at the process level expression patterns observed in the SOM analysis, where  
368 some gene clusters clearly underwent reciprocal regulation, increasing/decreasing  
369 between days 2 and 5, remaining relatively constant between days 5 and 10, and returning  
370 to their prior levels between days 10 and 28.

371

372 **Fig 4. Temporal changes in mRNA abundance reflect evolving biological processes**  
373 **during MC3T3-E1 differentiation.** The mRNA abundance of 976 significantly  
374 regulated genes identified by ANOVA as changing during MC3T3-E1 differentiation was  
375 used to calculate expression ratios comparing D2 vs D5, D5 vs D10, and D10 vs D28.  
376 For each pairwise comparison, the earlier time point was used as the denominator and  
377 later time point as the numerator, such that expression ratios reflect increases/decreases in  
378 mRNA abundance as differentiation proceeds. IPA Downstream Effects Analysis was  
379 performed to identify biological process terms associated with each interval and filtered  
380 to include terms only with  $-\log(p \text{ value}) > 1.3$ , minimum of two genes, and z-score  $> 1$  or  
381  $< -1$ . The graph depicts z-score values for terms associated with the period of growth  
382 arrest and onset of differentiation (gold bars), active differentiation (blue bars), and  
383 osteoblast maturation (lavender bars). The descriptive annotations associated with each  
384 term are omitted for simplicity but presented in S3 Table.

385

386 To resolve the temporal changes in signaling networks associated with  
387 osteoblastic differentiation of MC3T3-E1 cells we performed IPA Upstream Regulator  
388 and Canonical Pathways Analysis using the 976 significantly regulated genes identified  
389 by ANOVA. The IPA Upstream Regulator Analysis predicts which transcriptional  
390 regulators are activated or inhibited based on observed changes in expression of  
391 downstream genes. Predicted upstream regulators with activation Z-scores  $> 2$  or  $< -2$   
392 during at least one phase of differentiation are shown in S4 Table. Individual upstream  
393 regulators were grouped based on the signaling networks with which they are most  
394 associated, and the z-scores derived from the D2 vs D5, D5 vs D10, and D10 vs D28  
395 comparisons used to generate heat maps that illustrate the predicted change in regulator  
396 activity as differentiation progresses. In these maps, rows represent individual upstream  
397 regulators and columns represent time intervals. Predicted increases in activity from the  
398 beginning to end of each interval, e.g. from day 2 to day 5, are indicated in red and  
399 decreases in blue, with color intensity representing the magnitude of the z-score. Thus, an  
400 upstream regulator that was predicted to increase in activity from day 2 to day 5, day 5 to  
401 day 10, and day 10 to day 28 would be red in all columns, while one that increased from  
402 day 2 to day 5 and then remained active at the same level would be red in the D2 vs D5  
403 column, then white in the D5 vs D10 and D10 vs D28 columns. As shown in Fig 5A,  
404 upstream regulators associated with cell cycle progression were predicted to become less  
405 active over time, consistent with the growth arrest of MC3T3-E1 cells that heralds the  
406 onset of differentiation. Conversely, upstream regulators of several pathways associated  
407 osteoblast differentiation, e.g. TGF $\beta$ /BMP/SMAD, WNT/ $\beta$ -catenin, and Hedgehog

408 signaling [4] were predicted to become more active as differentiation progressed, as did  
409 regulators of TNF $\alpha$ /RANKL/NF $\kappa$ B and cytokine/JAK-STAT signaling.

410

411 **Fig 5. Temporal changes in predicted upstream regulators and canonical signaling**

412 **pathways associated with MC3T3-E1 cell differentiation.** Microarray data on the 976

413 significantly regulated mRNA species were used to calculate change in expression ratio

414 between D2 vs D5, D5 vs D10, and D10 vs D28. Expression ratios were analyzed using

415 IPA Upstream Regulator and Canonical Pathways Analysis software and heat maps

416 reflecting the changes in predicted activity during each interval were generated using

417 Morpheus software. **A.** Heat maps depicting changes in selected upstream regulators

418 (rows) with activation z-scores  $> 2$  (red) or  $< -2$  (blue) during at least one phase of

419 differentiation (columns). Upstream regulators were arbitrarily grouped based on their

420 involvement in biological processes or signaling pathways related to osteoblast

421 differentiation. **B.** Heat maps depicting changes in z-score for selected canonical

422 signaling pathways (rows) during each phase of differentiation (columns). Z-scores were

423 subjected to Euclidean hierarchical clustering in Morpheus to group pathways based on

424 similarity in temporal change.

425

426 To gain insight into how predicted changes in the activity of individual upstream

427 regulators were integrated into signaling networks, we next performed IPA Canonical

428 Pathways Analysis, which compares observed changes in mRNA abundance to the

429 expected direction of change associated with pathway activation or inhibition. The list of

430 signaling pathways represented in the dataset along with  $-\log(p\text{-value})$  and activation z-

431 score are shown in S5 Table. Fig 5B depicts a heat map of predicted changes in activity  
432 in selected canonical signaling pathways. Hierarchical clustering was performed to group  
433 pathways based on similarities in the change in activity over time. Considering pathways  
434 known to be involved in bone development, Wnt/ $\beta$ -catenin signaling decreased in activity  
435 as differentiation progressed, while TGF $\beta$  signaling increased. The TGF- $\beta$ /BMP axis is a  
436 principal regulator of mesenchymal stem cell differentiation into cartilage and bone [19-  
437 22], acting through several effectors including SMADs, p38 mitogen-activated protein  
438 kinase (MAPK), and phosphatidyl inositol 3-kinase (PI3K)/AKT. TGF- $\beta$ /BMP engages  
439 in extensive cross talk with other receptor-mediated signaling in bone, including WNT/ $\beta$ -  
440 catenin, Notch, Hedgehog, fibroblast growth factor (FGF), parathyroid hormone-related  
441 peptide (PTHrp), and interleukin (IL)/TNF $\alpha$ /interferon- $\gamma$  cytokines that collectively  
442 signal via the JAK/STAT and NF $\kappa$ B pathways [4,23]. Notably, several of these pathways,  
443 e.g. p38 MAPK, STAT3, NF $\kappa$ B and IL6 signaling also showed a trend toward activation  
444 during differentiation.

445

## 446 **NanoString<sup>TM</sup> analysis of MC3T3-E1 differentiation**

447 To validate our “agnostic” microarray data on signaling pathway activation, we  
448 performed a “focused” analysis of MC3T3-E1 cell gene rexpession using NanoString<sup>TM</sup>  
449 nCounter. The NanoString<sup>TM</sup> nCounter system uses color-coded molecular “barcodes”  
450 attached target-specific probes to count up to several hundred unique transcripts in a  
451 single hybridization reaction [15,16]. The culture protocol used for the microarray  
452 experiment was repeated to provide independent mRNA samples. Triplicate samples of  
453 total mRNA isolated from MC3T3-E1 cells at days 2, 5, 10 and 28 in culture were

454 analyzed using a NanoString™ Code Set designed to quantify the abundance of 237  
455 transcripts related to bone development and signaling. S1 Table lists the gene name,  
456 annotation, and expression data for the NanoString™ probes. Fig 6A shows a heat map of  
457 all 237 transcripts assayed. As with the microarray data, hierarchical clustering revealed  
458 several distinct temporal patterns of expression, with some groups of transcripts  
459 increasing/decreasing in abundance early in differentiation and others changing most  
460 dramatically later during osteoblast maturation. Fig 6B-E shows temporal changes in  
461 selected transcripts related to pathways identified in the bioinformatics analysis of the  
462 microarray data. Significant changes in mRNA abundance were detected in ligands,  
463 receptors or modulators of BMP, TGFβ and Activin signaling, the three closely-related  
464 components of the TGFβ network, as well as in the TNFα-NFκB, interleukin-JAK/STAT,  
465 and WNT/β-catenin pathways.

466

467 **Fig. 6. NanoString™ analysis of bone-related mRNAs during MC3T3-E1 cell**  
468 **differentiation.** Total RNA was isolated from triplicate cultures of MC3T3-E1 cells at  
469 days 2, 5, 10 and 28, and mRNA abundance quantified by NanoString™ nCounter using  
470 a bone specific Code Set (S1 Table). **A.** Heat map depicting changes in mRNA  
471 abundance for individual mRNA species (rows) over time in culture (columns) for day 2  
472 (D2), day 5 (D5), day 10 (D10), and day 28 (D28). Expression data, after log<sub>2</sub>  
473 adjustment, were subjected to Euclidean hierarchical clustering in Morpheus to group  
474 genes based on similarity in temporal change. **B.** mRNA abundance of selected ligands,  
475 receptors, modulators, and mediators related to BMP/TGFβ/Activin, TNFα/NFκB,  
476 IL/JAK-STAT, and WNT/β-catenin signaling. BMP pathway components shown are:

477 BMP 4 (*Bmp4*); BMP receptor 1A (*Bmpr1a*); BMP receptor 2 (*Bmpr2*); the BMP co-  
478 receptors, repulsive guidance molecule (RGM) A (*Rgma*) and RGM B (*Rgmb*); the BMP  
479 negative regulators, Chordin and Noggin; and the DAN family BMP antagonist, Gremlin.  
480 TGF $\beta$  pathway components shown are: TGF $\beta$ 1 (*Tgfb1*); TGF $\beta$ 2 (*Tgfb2*); TGF $\beta$ 3  
481 (*Tgfb3*); TGF $\beta$  receptor 1 (*Tgfr1*); and TGF $\beta$  receptor 2 (*Tgfr2*). Activin pathway  
482 components shown are: inhibin subunit  $\beta$ A (*Inhba*); activin A receptor type 1 (*Acvr1*);  
483 activin A receptor type 1B (*Acvr1b*); activin A receptor type 2A (*Acvr2a*); BMP and  
484 activin membrane bound inhibitor (*Bambi*); and the activin and TGF $\beta$  receptor ligand,  
485 left-right determination factor 1 (*Lefty*). TNF $\alpha$  pathway components shown are: TNF  
486 ligand superfamily member 13-like (*April*); TNF (*Tnf*); RANKL (*Tnfrsf11*); TNF-receptor  
487 superfamily member 4 (*Tnfrsf4*); receptor activator of NF $\kappa$ B (*Tnfrsf11a*); TNF receptor  
488 superfamily member 11b (*Tnfrsf11b*); and NF $\kappa$ B (*Nfkb*). Interleukin pathway  
489 components shown are: IL1B (*Il1b*); IL4 (*Il4*); IL7 (*Il7*); IL12A (*Il12a*); IL1 receptor-like  
490 1 (*Il1rl1*); IL2 receptor  $\beta$  subunit (*Il2rb*); IL4 receptor  $\alpha$  subunit (*Il4ra*); IL15 receptor  $\alpha$   
491 subunit (*Il15ra*); and STAT1 (*Stat1*). WNT pathway components shown are: WNT 5A  
492 (*Wnt5a*); Wnt 7A (*Wnt7a*); the WNT signaling pathway inhibitor, Dickkopf (*Dkk1*);  $\beta$ -  
493 catenin (*Ctnnb1*); the regulator of  $\beta$ -catenin stability, Axin 2 (*Axin2*); and the  $\beta$ -catenin  
494 regulated transcription factors, nuclear factor of activated T cells 1 (*Nfatc1*) and  
495 transcription factor 7 (*Tcf7*). In each graph, symbols representing ligands are show in  
496 green, receptor subunits in blue, intracellular mediators and modulators in red, and  
497 transcription factors in lavender. Data shown represent the Mean  $\pm$  SD of triplicate  
498 samples. Error bars not shown are smaller than the symbol. † P<0.05; \* P<0.01; \*\*

499 P<0.001 different in abundance between at least two time points by two-way ANOVA  
500 with Tukey's multiple comparisons test; ns, not significant.

501

502 To determine how the changing levels of pathway components translated into  
503 changes in pathway activity during differentiation, we performed IPA Upstream  
504 Regulator and Canonical Pathways Analysis using expression ratios derived from  
505 comparisons of the NanoString™ data for D2 vs D5, D5 vs D10, and D10 vs D28.  
506 Predicted upstream regulators with activation z-scores > 2 or < -2 during at least one  
507 phase of differentiation are shown in S6 Table. Selected upstream regulators were  
508 grouped based on the signaling networks with which they are most associated, and the z-  
509 scores used to generate heat maps. As shown in Fig 7A, upstream regulator activity  
510 associated with cell cycle progression, apoptosis, and cell survival tended to decrease  
511 between days 2 and 5 and days 5 and 10, then increase between days 10 and 28. Notably,  
512 activity of the anti-apoptotic regulators AKT1 and p38 MAPK that function downstream  
513 of TGFβ/BMP and TNFα/RANKL increased as differentiation progressed. Coincident  
514 with this, upstream regulators related to TGFβ/BMP/SMAD, WNT/β-catenin, and  
515 Hedgehog signaling showed activation during osteoblastic differentiation, as did  
516 regulators involved in TNFα/RANKL/NFκB, cytokine/JAK-STAT, receptor tyrosine  
517 kinase (RTK), and G protein-coupled receptor (GPCR) signaling.

518

519 **Fig 7. Upstream regulators and canonical signaling pathways analysis of a focused**  
520 **NanoString™ dataset.** NanoString™ nCounter data on the abundance of 237 bone-  
521 related mRNA species were used to calculate change in expression ratio between D2 vs

522 D5, D5 vs D10, and D10 vs D28. Expression ratios were analyzed using IPA Upstream  
523 Regulator and Canonical Pathways Analysis software and heat maps reflecting the  
524 changes in predicted activity during each interval were generated using Morpheus  
525 software. **A.** Heat maps depicting changes in selected upstream regulators (rows) with  
526 activation z-scores  $> 2$  (red) or  $< -2$  (blue) during at least one phase of differentiation  
527 (columns). Upstream regulators were arbitrarily grouped based on their relationship to  
528 biological processes or signaling pathways involved in osteoblast differentiation. **B.** Heat  
529 maps depicting changes in z-score for selected canonical signaling pathways (rows)  
530 during each phase of differentiation (columns). Z-scores were subjected to Euclidean  
531 hierarchical clustering in Morpheus to group pathways based on similarity in temporal  
532 change.

533

534 We next performed IPA Canonical Pathways Analysis using the NanoString™  
535 dataset. The list of signaling pathways represented along with  $-\log(\text{p-value})$  and  
536 activation z-score are shown in S7 Table. Fig. 7B depicts a heat map of predicted changes  
537 in activity in selected canonical signaling pathways. Hierarchical clustering was  
538 performed to group pathways based on similarities in the change in activity over time.  
539 Consistent with the canonical pathways analysis of the microarray dataset (Fig 5),  
540 WNT/ $\beta$ -catenin signaling became less active as differentiation progressed, while TGF $\beta$   
541 and BMP signaling increased, although the changes in the NanoString™ dataset were  
542 more apparent later than in the microarray dataset, between day 10 and day 28.  
543 Interleukin signaling was predicted to increase progressively between days 5 and 28, with  
544 JAK-STAT signaling showing the activation between days 10 and 28. TNF $\alpha$ /NF $\kappa$ B



545 pathway signaling was likewise predicted to increase in both the NanoString™ and  
546 microarray datasets.

547

## 548 **Overview of signaling networks during MC3T3-E1**

### 549 **differentiation**

550 To test the overall similarity between the NanoString™ and microarray datasets  
551 we compared the pathway activity predictions generated from each using the IPA  
552 Canonical Pathways molecular activity predictor tool, which graphically depicts the  
553 predicted change in pathway activity based on observed changes in upstream and  
554 downstream gene expression. S1 Fig shows the WNT/ $\beta$ -catenin pathway comparison  
555 using D2 vs D5 expression ratios from each dataset. Since WNT/ $\beta$ -catenin signaling was  
556 predicted to decline as differentiation progressed, it would be most active during this  
557 interval. Consistent with this, both datasets indicated  $\beta$ -catenin pathway activation in this  
558 time frame, as well as inhibition of the negative regulatory TGF $\beta$ /TGF $\beta$ -activated kinase  
559 1 (TAK1)/p38 MAPK/nemo like kinase (NLK) input from the TGF $\beta$  receptor pathway  
560 that was predicted to be less active early in differentiation. S2 Fig compares IPA  
561 predicted changes in activity within the TGF $\beta$ /BMP signaling network occurring between  
562 days 10 and 28, an interval during which both datasets indicated pathway activation.  
563 While the focused Nanostring™ dataset better captured activation of BMP receptor  
564 signaling during this phase of differentiation, both datasets predicted net activation of the  
565 SMAD2/3 and TAK1/p38 MAPK components of TGF $\beta$  signaling. S3 Fig compares the  
566 IPA predicted changes in the canonical TNF $\alpha$ /NF $\kappa$ B signaling pathway between days 10  
567 and 28 in culture. The TNF $\alpha$  network plays a key role during osteoblast maturation,

568 acting as an inhibitor of osteoblast differentiation and, along with RANKL, promoting  
569 osteoclast development [24,25]. Both datasets indicated net activation of NF $\kappa$ B-  
570 dependent transcription during MC3T3-E1 maturation related to changes in the  
571 expression of TNF family and growth factor ligands and receptors. Both datasets also  
572 indicated relative inhibition of interleukin receptor-mediated NF $\kappa$ B activation through  
573 TNF receptor-associated factor 6 (TRAF6)/TAK1. S4 Fig illustrates the predicted  
574 activation of canonical STAT3 signaling downstream of cytokine and growth factor  
575 receptors between days 10 and 28 observed in both the microarray and Nanostring™  
576 nCounter datasets. Collectively, the data indicate substantial concordance between the  
577 two independent MC3T3-E1 datasets and highlight the evolving changes in WNT/ $\beta$ -  
578 catenin, TGF $\beta$ /BMP/SMAD, TNF $\alpha$ /RANKL/NF $\kappa$ B, and cytokine/JAK-STAT signaling  
579 associated with osteoblast differentiation.

580 To illustrate the temporal evolution of signaling network interaction during  
581 MC3T3-E1 cell differentiation, we generated pathway activity predictions for the IPA  
582 osteoarthritis canonical pathway, which integrates multiple signal inputs controlling  
583 expression of bone-related genes. As the first transcription factor required for osteoblastic  
584 differentiation, control of Runx2-dependent transcription is central to the process [17,18].  
585 Runx2 activity reflects the input of multiple upstream regulators, notably including BMP  
586 receptors signaling via SMAD1/5/8 as well as TGF $\beta$  and activin receptors signaling  
587 through SMAD2/3. Given that the NanoString™ Code Set was selected to examine bone-  
588 related genes, the osteoarthritis network was the most heavily populated canonical  
589 pathway in our IPA analysis with a  $-\log(p\text{-value})$  of 43.3 (S7 Table). Fig 8 shows the  
590 pathway activity analysis based on D2 vs D5 expression ratio changes from the

591 NanoString™ nCounter dataset. During this phase, MC3T3-E1 cells are transitioning  
592 from log phase growth to growth arrest and initiating the process of differentiation.  
593 Based on observed upregulation of Runx2, Sp7 and Sox9 mRNA, Runx2-dependent  
594 transcription is predicted to increase from Day 2 to Day 5, associated with increases in  
595 mRNA encoding collagen species and alkaline phosphatase. Observed changes in genes  
596 encoding Indian Hedgehog (IHH), Patched (PTCH) and  $\beta$ -catenin, as well as TNF $\alpha$ ,  
597 IL1B, TGF $\beta$  and TGF $\beta$  receptor 2 (TGFB2), suggest that the onset of differentiation  
598 coincides with upregulation of autocrine ligands and receptors that later come to drive the  
599 differentiation process. Notably, TGF $\beta$ /BMP signaling is not yet predicted to be active  
600 due to relative downregulation of BMP2/9 and SMAD2/3.

601

602 **Fig 8. Changes in canonical signaling pathway activity in MC3T3-E1 cells between**  
603 **days 2 and 5.** Expression ratios representing the changing abundance of 237 bone-related  
604 mRNA species in MC3T3-E1 cells between days 2 and 5 in culture were used to populate  
605 the IPA osteoarthritis pathway network and signaling pathway activation state was  
606 assessed using the IPA molecular pathway predictor tool. As indicated in the prediction  
607 legend, observed upregulation and downregulation of mRNAs are shown in red and  
608 green, respectively, while predicted activation or inhibition of signaling intermediates and  
609 pathways are shown in orange and blue.

610

611 Fig 9 depicts the results of an identical analysis performed using the D5 vs D10  
612 expression ratio changes from the Nanostring™ nCounter dataset. This phase is  
613 associated with osteoblastic differentiation and increased expression of secreted growth

614 factors and matrix components, but relatively little matrix mineralization (Figs 1 and 2).  
615 The network analysis suggests that increasing expression of Runx2 and Sp7 is now  
616 associated with upregulation of the Runx2-regulated matrix components osteopontin  
617 (Spp1) and osteocalcin (Bglap2), and further increases in expression of collagen species  
618 and alkaline phosphatase, along with the upstream regulators IHH,  $\beta$ -catenin, TNF $\alpha$ ,  
619 IL1B, and TGF $\beta$ . Increasing expression of BMP2 and BMP9 is now evident, although  
620 the molecular pathway predictor still suggests that SMAD1/5/8 and SMAD2/3 signaling  
621 is attenuated. Fig 10 depicts predicted changes in signaling pathway activity based on the  
622 D10 vs D28 expression ratio changes. This phase is associated with osteoblast  
623 maturation, further increases in expression of secreted growth factors and matrix  
624 components, and the onset of matrix mineralization. The most notable changes during  
625 this interval are the activation of SMAD1/5/8 signaling downstream of BMP receptors  
626 and SMAD2/3 signaling from TGF $\beta$  receptors. Observed upregulation of the BMP  
627 receptors Bmpr1a (ALK3) and Bmpr2 (BMPR2) and the activin-like receptor Acvr11  
628 (ALK1), and SMAD2/3 likely contributes to the prediction of increased pathway activity.  
629 Upregulation of PTHrp/PTH1R and FGF2/FGF8 also suggests that GPCR and RTK  
630 signaling increase during this interval. Hence the data suggest that during osteoblastic  
631 differentiation of MC3T3-E1 cells, activation of  $\beta$ -catenin- and NF $\kappa$ B-mediated  
632 pathways occurs prior to the onset of TGF $\beta$ /BMP/SMAD-mediated signaling and a  
633 general activation of bone developmental signaling pathways.

634

635 **Fig 9. Changes in canonical signaling pathway activity in MC3T3-E1 cells between**  
636 **days 5 and 10.** Expression ratios representing the changing abundance of 237 bone-

637 related mRNA species in MC3T3-E1 cells between days 5 and 10 in culture were used to  
638 populate the IPA osteoarthritis pathway network and signaling pathway activation state  
639 was assessed using the IPA molecular pathway predictor tool. Observed upregulation  
640 and downregulation of mRNAs are shown in red and green, respectively, while predicted  
641 activation or inhibition of signaling intermediates and pathways are shown in orange and  
642 blue.

643

644 **Fig 10. Changes in canonical signaling pathway activity in MC3T3-E1 cells between**  
645 **days 10 and 28.** Expression ratios representing the changing abundance of 237 bone-  
646 related mRNA species in MC3T3-E1 cells between days 10 and 28 in culture were used  
647 to populate the IPA osteoarthritis pathway network and signaling pathway activation state  
648 was assessed using the IPA molecular pathway predictor tool. Observed upregulation  
649 and downregulation of mRNAs are shown in red and green, respectively, while predicted  
650 activation or inhibition of signaling intermediates and pathways are shown in orange and  
651 blue.

652

## 653 **Discussion**

654 Complex biological processes like osteoblast development involve the  
655 coordinated regulation of multiple intracellular signaling pathways controlling gene  
656 expression. Thus, studies focusing on the contribution of any individual growth factor or  
657 pathway are invariably incomplete. Developing a more complete picture requires the use  
658 of “omics” approaches that capture as much information as possible about changes in  
659 intracellular signaling networks in as unbiased a manner as possible. Further

660 complicating matters, bone remodeling *in vivo* is a continuous process wherein  
661 osteoblasts at all stages of development, from mesenchymal stem cell precursors to  
662 osteocytes are present, along with cells of the osteoclast lineage and other cell types [1,2].  
663 As a result, studies performed on bone only provide a “snapshot” of the tissue average  
664 transcriptome that represents multiple cell types present in different proportions and  
665 differentiations states. In this study, we combined transcriptomics with bioinformatic  
666 geneset enrichment analysis to examine the temporal sequence of autocrine and paracrine  
667 signaling that regulates the differentiation of MC3T3-E1 cells, a well-characterized  
668 model of osteoblast development [7-10]. We employed two independently generated  
669 datasets, an “agnostic” DNA microarray dataset intended to provide a global overview of  
670 the evolving transcriptome and a “targeted” NanoString™ nCounter dataset focusing on  
671 genes involved in specific bone-related pathways. Our data complement other *in vitro*  
672 microarray studies of osteoblastic differentiation performed using different cell types, e.g.  
673 mesodermal progenitor cells, calvarial osteoblasts, osteocytes, periodontal ligament cells,  
674 and embryonic stem cells [21,26-30], or describing the effects of exogenous factors on  
675 osteoblast gene expression [31-34].

676         Although osteoblast differentiation *in vivo* is subject to regulation by numerous  
677 circulating factors [3], our results underscore the importance of cell autonomous  
678 autocrine/paracrine signaling. Key to the process is regulation of Runx2, the most  
679 upstream transcription factor in osteoblast differentiation [17,18], which regulates the  
680 expression of another critical transcription factor in bone, Sp7 [35]. Runx2 expression in  
681 osteoblasts is stimulated by an enhanceosome composed of Dlx5/6, Mef2, Tcf7,  $\beta$ -  
682 catenin, Sox5/6, Smad1, and Sp7, and in turn stimulates expression of bone matrix

683 proteins including Spp1, Ibsp, and Bglap2, and autocrine factors including Ihh and Rankl  
684 [35,36]. Our data suggest that early MC3T3-E1 differentiation, between Days 2 and 5, is  
685 characterized by increasing expression of Runx2, Sp7, and  $\beta$ -catenin and upregulation of  
686 IHH,  $\text{TNF}\alpha$ , and  $\text{IL1}\beta$  at a time where  $\text{TGF}\beta$ / $\text{BMP}$ / $\text{SMAD}$  signaling is still relatively  
687 suppressed despite increasing expression of  $\text{TGF}\beta$  and  $\text{TGF}\beta$  receptors. WNT signaling,  
688 which cooperates with  $\text{TGF}\beta$  in a positive regulatory loop by inducing Runx2-dependent  
689 transcription of  $\text{TGF}\beta$ 1 receptor [37,38], appeared most active early and to wane as  
690  $\text{TGF}\beta$ / $\text{BMP}$  pathway activity increased, consistent with a role for WNT signaling in the  
691 induction of  $\text{TGF}\beta$  signaling. The central role of the  $\text{TGF}\beta$ / $\text{BMP}$  axis in regulating  
692 mesenchymal stem cell differentiation into cartilage and bone is well established, as both  
693 canonical  $\text{SMAD}$ -dependent and non-canonical p38MAPK signaling downstream of  
694 these receptors converge on Runx2 to promote differentiation [19-22]. Moreover, in bone  
695  $\text{TGF}\beta$ / $\text{BMP}$  in extensive cross talk with other signaling pathways [4,23]. Of these, the  
696 activity of several, including Hedgehog, FGF2, interleukins,  $\text{TNF}\alpha$ / $\text{RANKL}$  and  
697 interferon- $\gamma$ , appeared to increase in parallel with  $\text{TGF}\beta$ / $\text{BMP}$  during MC3T3-E1 cell  
698 differentiation. Hedgehog signaling, acting through Gli family transcription factors,  
699 promotes the expression of BMP2, and IHH has been shown to be required for  
700 osteogenesis *in vitro* [39,40]. FGF2 regulates expression of PC1, the primary enzymatic  
701 generator of pyrophosphate in mineralizing cells, by direct regulation of Runx2,  
702 suggesting that  $\text{TGF}\beta$ / $\text{BMP}$  and FGF2 signaling cooperate to promote matrix  
703 mineralization later in differentiation [41].  $\text{TNF}\alpha$  plays many roles in bone, inhibiting  
704 osteoblast differentiation and collagen synthesis (42,43), promoting osteoblast apoptosis  
705 (44), while directly stimulating osteoclast formation independent of  $\text{RANKL}$  signaling

706 through an IL1-dependent mechanism (45,46). Conversely, interferon- $\gamma$  opposes IL1 and  
707 TNF $\alpha$  mediated bone resorption, but produces additive inhibition of bone collagen  
708 synthesis (47). Thus our network analysis, demonstrating simultaneous changes in the  
709 TGF $\beta$ /BMP pathways that favoring osteoblast differentiation and survival, the TNF $\alpha$   
710 pathway that inhibits differentiation and favors apoptosis, and the interferon- $\gamma$  pathway  
711 that inhibits ongoing collagen synthesis, illustrates the complexity of osteoblast  
712 development and maturation that occur in the setting of opposing autocrine signaling  
713 loops.

714 While gene array technology is a powerful tool for determining the transcriptional  
715 basis of changing developmental or pharmacological processes, the resulting datasets are  
716 both too complex and too error prone to reliably base conclusions on casual inspection  
717 [5,6]. Metabolic pathways analysis overcomes several of these limitations. By basing  
718 conclusions on the number and magnitude of expression changes across gene clusters,  
719 rather than individual genes, it decreases the probability of false discovery, while  
720 simultaneously providing a quantitative measure of the probability of change in a given  
721 signaling network. Our analyses illustrate several of the advantages and disadvantages of  
722 this approach. The murine Operon V2.0 cDNA arrays employed in this study did not  
723 provide genome-wide coverage of changes in mRNA abundance. The NanoString<sup>TM</sup>  
724 nCounter system provides information only about rationally chosen transcripts. Hence,  
725 some information is missing. Moreover, transcriptomic datasets in general are limited in  
726 their ability to discriminate changes in cellular metabolism simply because important  
727 pathway components may not be regulated at the transcriptional level, rendering them  
728 “invisible” in gene array experiments. Bioinformatic tools, such as IPA, that “infer”



729 changes in upstream pathway activity based on observed changes in network  
730 components, provide a means to translate incomplete transcriptomic datasets into a more  
731 complete picture of metabolic activity. In our study, we took two independently  
732 generated sets of mRNA samples from differentiating MC3T3-E1 cells and employed  
733 two different approaches to pathways analysis. Close inspection of the data (S1 and S2  
734 Tables) shows that the relatively stringent statistical filter applied to the microarray  
735 dataset to define significant change failed to capture factors that were seen in the  
736 NanoString™ assay, and conversely, that the targeted NanoString™ Code Set missed  
737 significant changes in factors that were detected with the broader coverage provided by  
738 the microarrays. It is also noteworthy that some of the interval expression ratios of  
739 individual factors were seen to change in opposite directions in the two datasets, such that  
740 focusing on the abundance of individual factors might lead to different conclusions. Yet  
741 the remarkable degree of similarity in the pathways analysis, which weighs changes  
742 across entire networks to predict pathway activation, suggests the approach is both  
743 reliable and robust enough to tolerate a substantial amount of “noise” in the raw data.  
744 Thus, starting from incomplete datasets, we were able to extract temporal changes in the  
745 autocrine/paracrine signaling networks that influence osteoblast differentiation *in vitro*,  
746 and find evidence of pathway cross talk at the transcriptional level.

747

## 748 **Acknowledgements**

749 Supported by NIH/NIGMS (R01 GM095497 and R35 GM126955) and the United  
750 States Department of Veterans Affairs (I01 BX003188). Some bioinformatic analyses  
751 were conducted through the Medical University of South Carolina (MUSC)

752 Proteogenomics Facility that was supported by NIH/NIGMS (P30 GM103342 and P20  
753 GM103499) and MUSC's Office of the Vice President for Research. The contents of this  
754 article do not represent the views of the Department of Veterans Affairs or the United  
755 States Government.

756

## 757 **Author Contributions**

758           Conceptualization: DGP, LML. Formal Analysis: LML, JLB. Funding  
759 Acquisition: LML. Investigation: MSD, HME-S, DGP, CJH, KMR. Writing: JLB,  
760 HME-S, DGP, CJH, LML.

761

## 762 **References**

- 763 1. Raisz LG. Physiology and pathophysiology of bone remodeling. Clin Chem.  
764 1999;45:1353-8.
- 765 2. Hadjidakis DJ, Androulakis II. Bone remodeling. Ann N Y Acad Sci. 2006;1092:385-  
766 96.
- 767 3. Raisz LG. Pathogenesis of osteoporosis: concepts, conflicts, and prospects. J Clin  
768 Invest. 2005;115:3318-25.
- 769 4. Wu M, Chen G, Li YP. TGF- $\beta$  and BMP signaling in osteoblast, skeletal  
770 development, and bone formation, homeostasis and disease. Bone Res. 2016;4:16009.
- 771 5. Allison DB, Cui X, Page GP, Sabripour M. Microarray data analysis: from disarray to  
772 consolidation and consensus. Nat Rev Genet. 2006;7:55-65.
- 773 6. Maudsley S, Chadwick W, Wang L, Zhou Y, Martin B, Park SS. (2011)

- 774 Bioinformatic approaches to metabolic pathways analysis. *Methods Mol Biol.*  
775 2011;756:99-130.
- 776 7. Quarles LD, Wenstrup RJ, Castillo SA, Drezner MK. Aluminum-induced mitogenesis  
777 in MC3T3-E1 osteoblasts: potential mechanism underlying neoosteogenesis.  
778 *Endocrinology.* 1991;128:3144-51.
- 779 8. Quarles LD, Yohay DA, Lever LW, Caton R, Wenstrup RJ. Distinct proliferative and  
780 differentiated stages of murine MC3T3-E1 cells in culture: an in vitro model of  
781 osteoblast development. *J Bone Miner Res.* 1992;7:683-92.
- 782 9. Franceschi RT, Iyer BS. Relationship between collagen synthesis and expression of  
783 the osteoblast phenotype in MC3T3-E1 cells. *J Bone Miner Res* 1992;7:235-46.
- 784 10. Franceschi RT, Iyer BS, Cui Y. Effects of ascorbic acid on collagen matrix formation  
785 and osteoblast differentiation in murine MC3T3-E1 cells. *J Bone Miner Res.*  
786 1994;9:843-54.
- 787 11. Wang D, Christensen K, Chawla K, Xiao G, Krebsbach PH, Franceschi RT. Isolation  
788 and characterization of MC3T3-E1 preosteoblast subclones with distinct in vitro and  
789 in vivo differentiation/mineralization potential. *J Bone Miner Res.* 1999;14:893-903.
- 790 12. Jones SJ, Gray C, Boyde A, Burnstock G. Purinergic transmitters inhibit bone  
791 formation by cultured osteoblasts. *Bone.* 1997;21:393-9.
- 792 13. Wang L, Liu S, Quarles LD, Spurney RF. Targeted overexpression of G protein-  
793 coupled receptor kinase-2 in osteoblasts promotes bone loss. *Am J Physiol*  
794 *Endocrinol Metab.* 2005;288:E826-34.
- 795 14. Smyth GK, Speed T. Normalization of cDNA microarray data. *Methods.* 2003;31:  
796 265-73.

- 797 15. Geiss GK, Bumgarner RE, Birditt B, Dahl T, Dowidar N, Dunaway DL, et al. Direct  
798 multiplexed measurement of gene expression with color-coded probe pairs. *Nature*  
799 *Biotechnol.* 2008;26:317–25.
- 800 16. Kulkarni MM. Digital Multiplexed Gene Expression Analysis Using the NanoString  
801 nCounter System. *Curr Protocol Mol Biol.* 2011;25B.10.1–17
- 802 17. Komori T. Regulation of osteoblast differentiation by Runx2. *Adv Exp Med Biol.*  
803 2010;658:43-9.
- 804 18. Komori T. Roles of Runx2 in Skeletal Development. *Adv Exp Med Biol.*  
805 2017;962:83-93.
- 806 19. Noda M, Rodan GA. Type beta transforming growth factor regulates expression of  
807 genes encoding bone matrix proteins. *Connect Tissue Res.* 1989;21:71-5.
- 808 20. Mundy GR, Bonewald LF. Role of TGF beta in bone remodeling. *Ann N Y Acad Sci.*  
809 1990;593:91-7.
- 810 21. Qi H, Aguiar DJ, Williams SM, La Pean A, Pan W, Verfaillie CM. Identification of  
811 genes responsible for osteoblast differentiation from human mesodermal progenitor  
812 cells. *Proc Natl Acad Sci U S A.* 2003;100:3305-10.
- 813 22. Augello A, De Bari C. The regulation of differentiation in mesenchymal stem cells.  
814 *Hum Gene Ther.* 2010;21:1226-38.
- 815 23. Guo X, Wang XF. Signaling cross-talk between TGF-beta/BMP and other pathways.  
816 *Cell Res.* 2009;19:71-88.
- 817 24. Novack DV. Role of NF-κB in the skeleton. *Cell Res.* 2011;21:169-82.
- 818 25. Kearns AE, Khosla S, Kostenuik PJ. Receptor activator of nuclear factor kappaB  
819 ligand and osteoprotegerin regulation of bone remodeling in health and disease.

- 820 Endocr Rev. 2008;29:155-92.
- 821 26. Granchi D, Ochoa G, Leonardi E, Devescovi V, Baglio SR, Osaba L, et al. Gene  
822 expression patterns related to osteogenic differentiation of bone marrow-derived  
823 mesenchymal stem cells during ex vivo expansion. Tissue Eng Part C Methods.  
824 2010;16:511-24.
- 825 27. Kalajzic I, Staal A, Yang WP, Wu Y, Johnson SE, Feyen JH, et al. Expression profile  
826 of osteoblast lineage at defined stages of differentiation. J Biol Chem.  
827 2005;280:24618-26.
- 828 28. Dean AK, Harris SE, Kalajzic I, Ruan J. A systems biology approach to the  
829 identification and analysis of transcriptional regulatory networks in osteocytes. BMC  
830 Bioinformatics. 2009;17;10 Suppl 9:S5.
- 831 29. Choi HD, Noh WC, Park JW, Lee JM, Suh JY. Analysis of gene expression during  
832 mineralization of cultured human periodontal ligament cells. J Periodontal Implant  
833 Sci. 2011;41:30-43.
- 834 30. Bourne S, Polak JM, Hughes SP, Buttery LD. Osteogenic differentiation of mouse  
835 embryonic stem cells: differential gene expression analysis by cDNA microarray and  
836 purification of osteoblasts by cadherin-11 magnetically activated cell sorting. Tissue  
837 Eng. 2004;10:796-806.
- 838 31. Qin L, Qiu P, Wang L, Li X, Swarthout JT, Soteropoulos P, et al. Gene expression  
839 profiles and transcription factors involved in parathyroid hormone signaling in  
840 osteoblasts revealed by microarray and bioinformatics. J Biol Chem 2003;278:19723-  
841 31.

- 842 32. Piek E, Sleumer LS, van Someren EP, Heuvel L, de Haan JR, de Grijns I, et al. Osteo-  
843 transcriptomics of human mesenchymal stem cells: accelerated gene expression and  
844 osteoblast differentiation induced by vitamin D reveals c-MYC as an enhancer of  
845 BMP2-induced osteogenesis. *Bone*. 2010;46:613-27.
- 846 33. Balint E, Lapointe D, Drissi H, van der Meijden C, Young DW, van Wijnen AJ, et al.  
847 Phenotype discovery by gene expression profiling: mapping of biological processes  
848 linked to BMP-2-mediated osteoblast differentiation. *J Cell Biochem*. 2003;89:401-  
849 26.
- 850 34. Bernardini C, Saulnier N, Parrilla C, Pola E, Gambotto A, Michetti F, et al. Early  
851 transcriptional events during osteogenic differentiation of human bone marrow  
852 stromal cells induced by Lim mineralization protein 3. *Gene Expr*. 2010;15:27-42.
- 853 35. Komori T. Regulation of osteoblast differentiation by transcription factors. *J Cell*  
854 *Biochem*. 2006;99:1233-9.
- 855 36. Kawane T, Komori H, Liu W, Moriishi T, Miyazaki T, Mori M, et al. Dlx5 and Mef2  
856 regulate a novel Runx2 enhancer for osteoblast-specific expression. *J Bone Min Res*.  
857 2014;29:1960–9.
- 858 37. van den Bosch MH, Blom AB, van Lent PL, van Beuningen HM, Blaney Davidson  
859 EN, van der Kraan PM, et al. Canonical Wnt signaling skews TGF- $\beta$  signaling in  
860 chondrocytes towards signaling via ALK1 and Smad 1/5/8. *Cell Signal*. 2014;26:951-  
861 8.
- 862 38. van den Bosch MH, Gleissl TA, Blom AB, van den Berg WB, van Lent PL, van der  
863 Kraan PM. Wnts talking with the TGF- $\beta$  superfamily: WISPers about modulation of  
864 osteoarthritis. *Rheumatology (Oxford)*. 2016;55:1536-47.

- 865 39. Long F, Chung UI, Ohba S, McMahon J, Kronenberg HM, McMahon AP. Ihh  
866 signaling is directly required for the osteoblast lineage in the endochondral skeleton.  
867 Development. 2004;131:1309-18.
- 868 40. Zhao M, Qiao M, Harris SE, Chen D, Oyajobi BO, Mundy GR. The zinc finger  
869 transcription factor Gli2 mediates bone morphogenetic protein 2 expression in  
870 osteoblasts in response to hedgehog signaling. Mol Cell Biol. 2006;26:6197-208.
- 871 41. Hatch NE, Li Y, Franceschi RT. FGF2 stimulation of the pyrophosphate-generating  
872 enzyme, PC-1, in pre-osteoblast cells is mediated by Runx2. J Bone Miner Res.  
873 2009;24:652-62.
- 874 42. Gilbert L, He X, Farmer P, Boden S, Kozlowski M, Rubin J, et al. Inhibition of  
875 osteoblast differentiation by tumor necrosis factor-alpha. Endocrinology.  
876 2000;141:3956-64.
- 877 43. Centrella M, McCarthy TL, Canalis E. Tumor necrosis factor-alpha inhibits collagen  
878 synthesis and alkaline phosphatase activity independently of its effect on  
879 deoxyribonucleic acid synthesis in osteoblast-enriched bone cell cultures.  
880 Endocrinology.1988;123:1442-8.
- 881 44. Jilka RL, Weinstein RS, Bellido T, Parfitt AM, Manolagas SC. Osteoblast  
882 programmed cell death (apoptosis): modulation by growth factors and cytokines. J  
883 Bone Miner Res. 1998;13:793-802.
- 884 45. Kobayashi K, Takahashi N, Jimi E, Udagawa N, Takami M, Kotaki S, et al. Tumor  
885 necrosis factor alpha stimulates osteoclast differentiation by a mechanism  
886 independent of the ODF/RANKL-RANK interaction. J Exp Med. 2000;191:275-86.
- 887 46. Wei S, Kitaura H, Zhou P, Ross FP, Teitelbaum SL. IL-1 mediates TNF-induced

888 osteoclastogenesis. J Clin Invest. 2005;115:282-90.

889 47. Smith DD, Gowen M, Mundy GR. Effects of interferon-gamma and other cytokines

890 on collagen synthesis in fetal rat bone cultures. Endocrinology. 1987;120:2494-9.

891

## 892 **Supporting Information Captions**

893

894 **S1 Fig. Comparison of WNT/ $\beta$ -catenin network activity between Days 2 and 5 of**

895 **MC3T3-E1 cell differentiation predicted from the microarray and NanoString™**

896 **datasets.** Observed Day 2 to Day 5 changes in expression ratios were used to predict

897 WNT/ $\beta$ -catenin pathway activity using the IPA molecular activity predictor tool. **A.**

898 Pathway activity prediction based on the microarray dataset. **B.** Pathway activity based

899 on the NanoString™ dataset. Observed increases (*red*) and decreases (*green*) in mRNA

900 abundance are indicated, as are predicted activation (*orange*) and inhibition (*blue*) of

901 downstream targets.

902

903 **S2 Fig. Comparison of TGF $\beta$ /BMP network activity between Days 10 and 28 of**

904 **MC3T3-E1 cell differentiation predicted from the microarray and NanoString™**

905 **datasets.** Observed Day 10 to Day 28 changes in expression ratios were used to predict

906 TGF $\beta$ /BMP pathway activity using the IPA molecular activity predictor tool. **A.**

907 Pathway activity prediction based on the microarray dataset. **B.** Pathway activity based

908 on the NanoString™ dataset. Observed increases (*red*) and decreases (*green*) in mRNA

909 abundance are indicated, as are predicted activation (*orange*) and inhibition (*blue*) of

910 downstream targets.



911

912 **S3 Fig. Comparison of NFκB network activity between Days 10 and 28 of MC3T3-**

913 **E1 cell differentiation predicted from the microarray and NanoString™ datasets.**

914 Observed Day 10 to Day 28 changes in expression ratios were used to predict NFκB

915 pathway activity using the IPA molecular activity predictor tool. **A.** Pathway activity

916 prediction based on the microarray dataset. **B.** Pathway activity based on the

917 NanoString™ dataset. Observed increases (*red*) and decreases (*green*) in mRNA

918 abundance are indicated, as are predicted activation (*orange*) and inhibition (*blue*) of

919 downstream targets.

920

921 **S4 Fig. Comparison of STAT3 network activity between Days 10 and 28 of MC3T3-**

922 **E1 cell differentiation predicted from the microarray and NanoString™ datasets.**

923 Observed Day 10 to Day 28 changes in expression ratios were used to predict STAT3

924 pathway activity using the IPA molecular activity predictor tool. **A.** Pathway activity

925 prediction based on the microarray dataset. **B.** Pathway activity based on the

926 NanoString™ dataset. Observed increases (*red*) and decreases (*green*) in mRNA

927 abundance are indicated, as are predicted activation (*orange*) and inhibition (*blue*) of

928 downstream targets.

929

930 **S1 Table. NanoString™ nCounter expression data for 237 bone-related transcripts.**

931 Gene symbol, accession number, annotation, NanoString™ probe ID, and mRNA

932 abundance data are shown for triplicate determinations at each of four time points.

933

934 **S2 Table. Operon V2.0 microarray expression data for 1005 significantly-regulated**  
935 **transcripts.** Gene symbol, accession number, gene name, mRNA abundance data, and z-  
936 standardized expression values are shown for triplicate determinations at each of four  
937 time points.

938

939 **S3 Table. IPA Disease or Function analysis of significantly-regulated transcripts**  
940 **identified by microarray.** Disease or function annotation,  $-\log(p \text{ value})$ , activation z-  
941 score, number and name of pathway molecules are shown for all functions with activation  
942 z-score  $>1$  or  $<-1$  in the D2 vs D5, D5 vs D10, and D10 vs D28 pairwise comparisons.

943

944 **S4 Table. IPA Upstream Regulator analysis of significantly-regulated transcripts**  
945 **identified by microarray.** Gene symbol and activation z-score are shown for all  
946 upstream regulators with activation z-score  $>2$  or  $<-2$  in the D2 vs D5, D5 vs D10, and  
947 D10 vs D28 pairwise comparisons.

948

949 **S5 Table. IPA Canonical Pathways analysis of significantly-regulated transcripts**  
950 **identified by microarray.** Canonical Pathway name,  $-\log(p\text{value})$ , activation z-score,  
951 and observed pathway molecules are shown for predicted regulated pathways in the D2  
952 vs D5, D5 vs D10, and D10 vs D28 pairwise comparisons.

953

954 **S6 Table. IPA Upstream Regulator analysis of the NanoString dataset of bone-**  
955 **related genes.** Gene symbol and activation z-score are shown for all upstream regulators

956 with activation z-score  $>2$  or  $<-2$  in the D2 vs D5, D5 vs D10, and D10 vs D28 pairwise  
957 comparisons.

958

959 **S7 Table. IPA Canonical Pathways analysis of the NanoString dataset of bone-**  
960 **related genes.** Canonical Pathway name,  $-\log(\text{pvalue})$ , activation z-score, and observed  
961 pathway molecules are shown for predicted regulated pathways in the D2 vs D5, D5 vs  
962 D10, and D10 vs D28 pairwise comparisons.

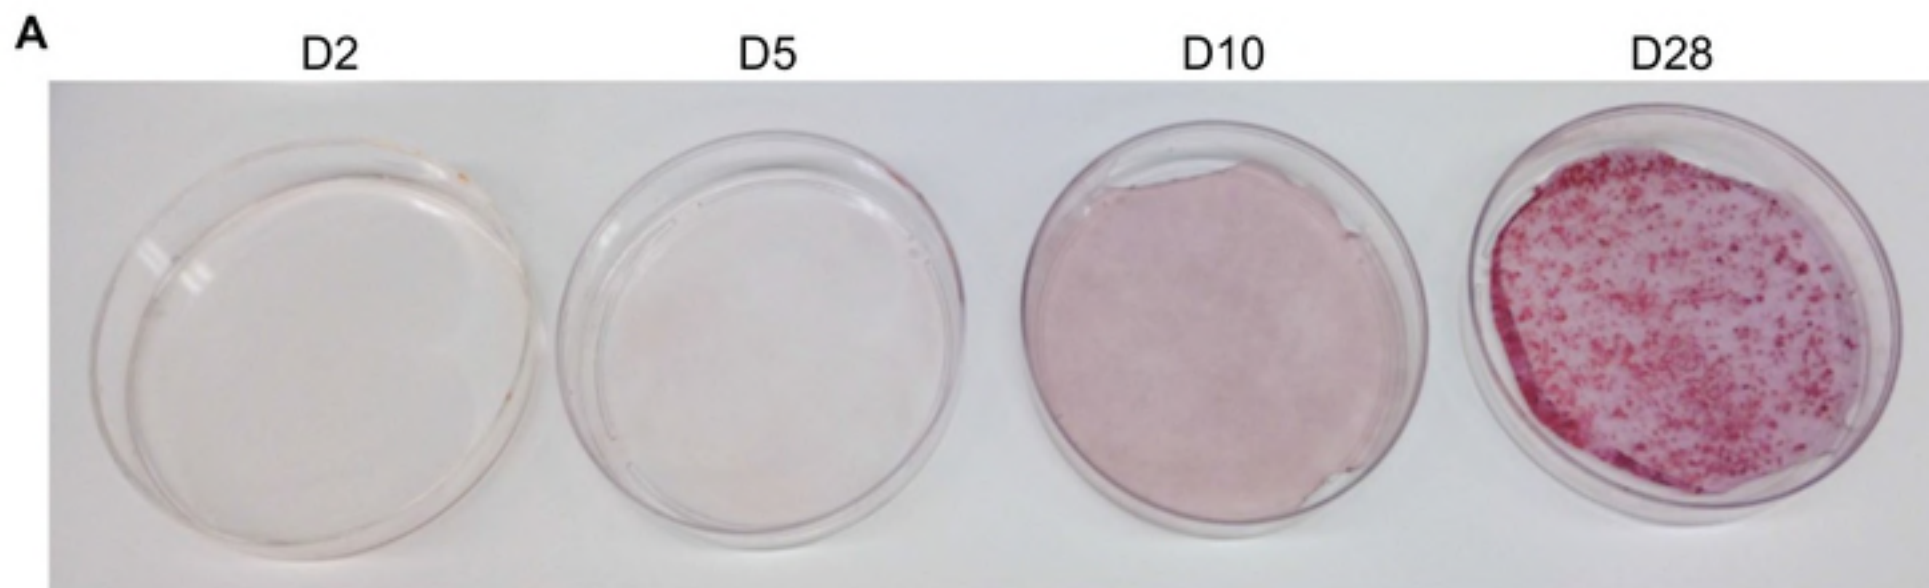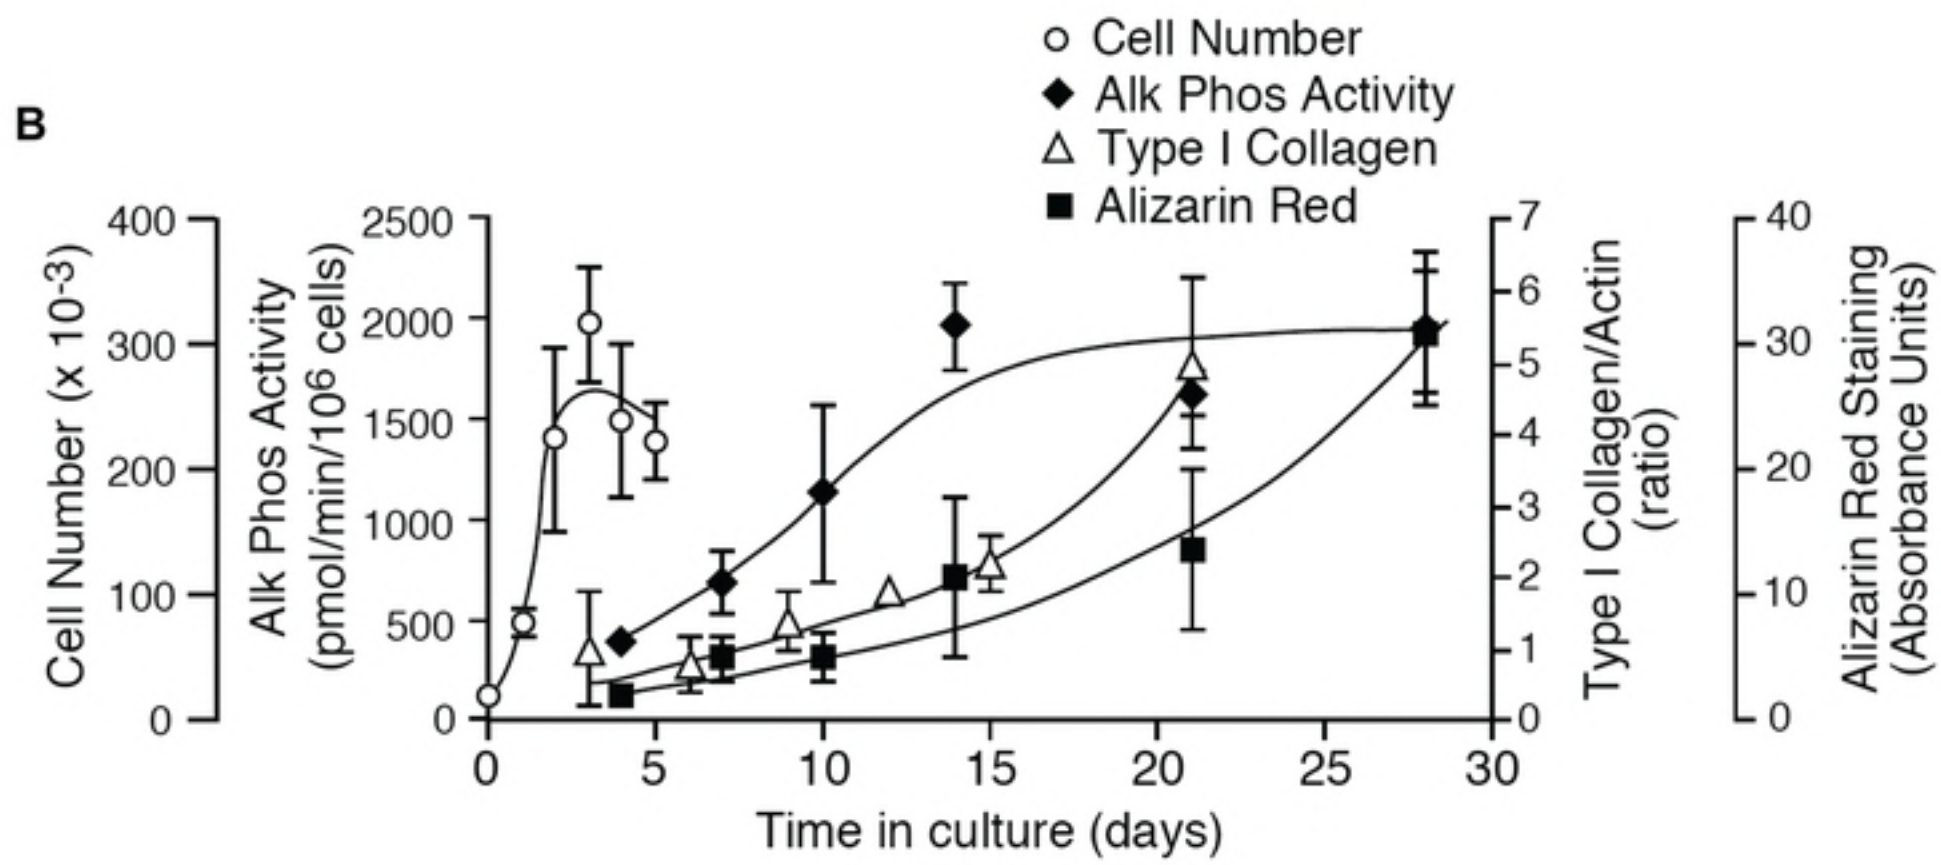

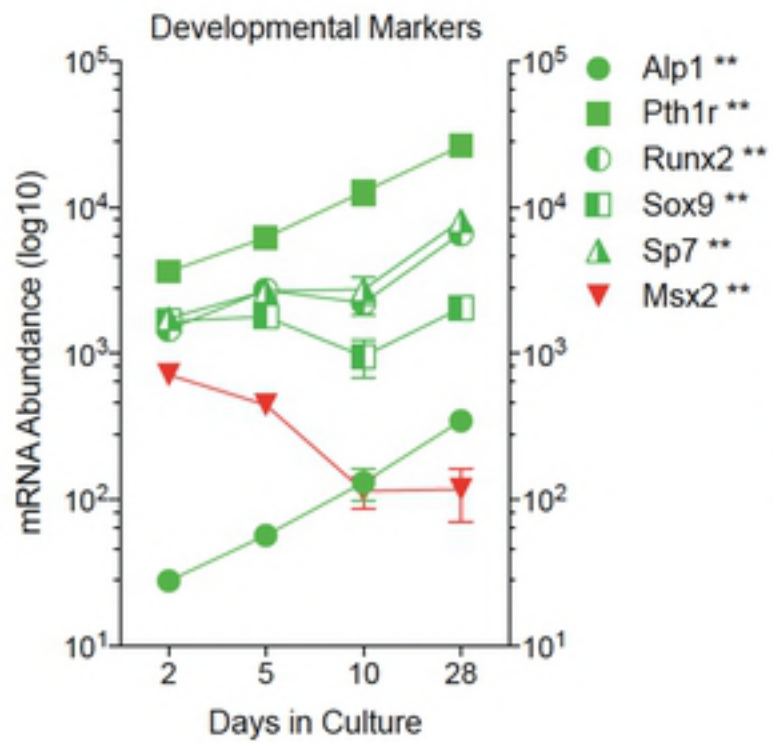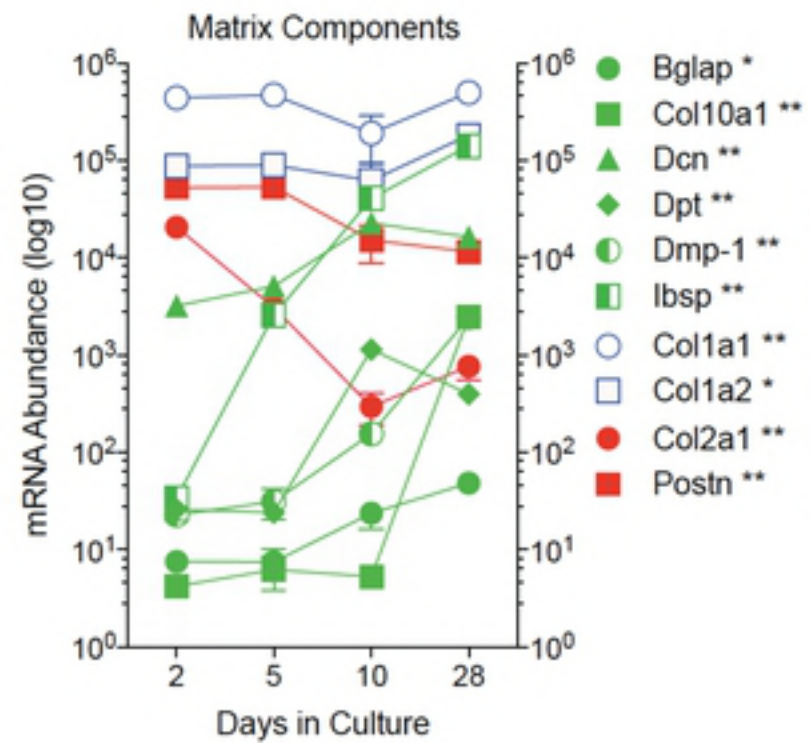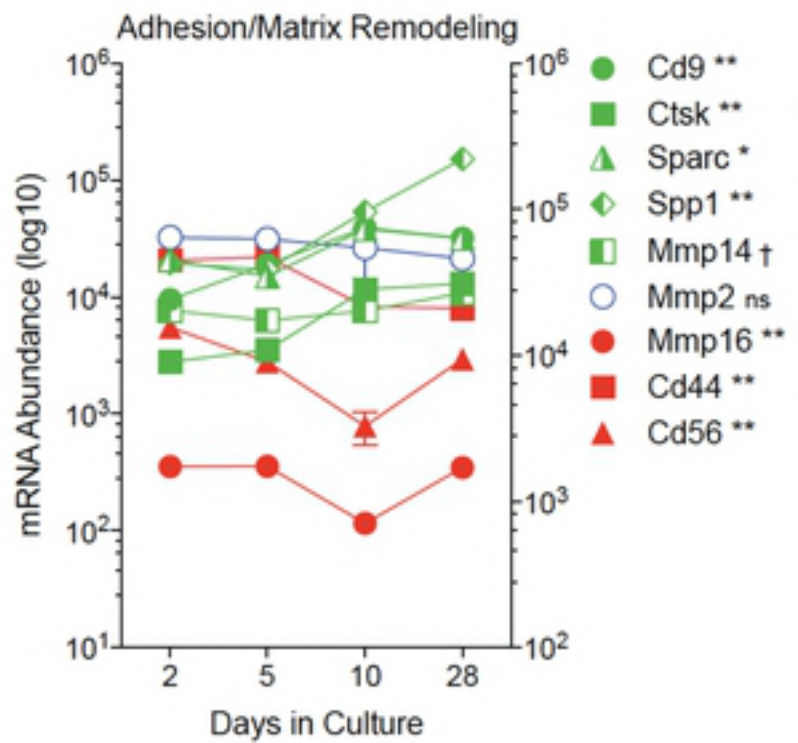

# IPA Biological Functions

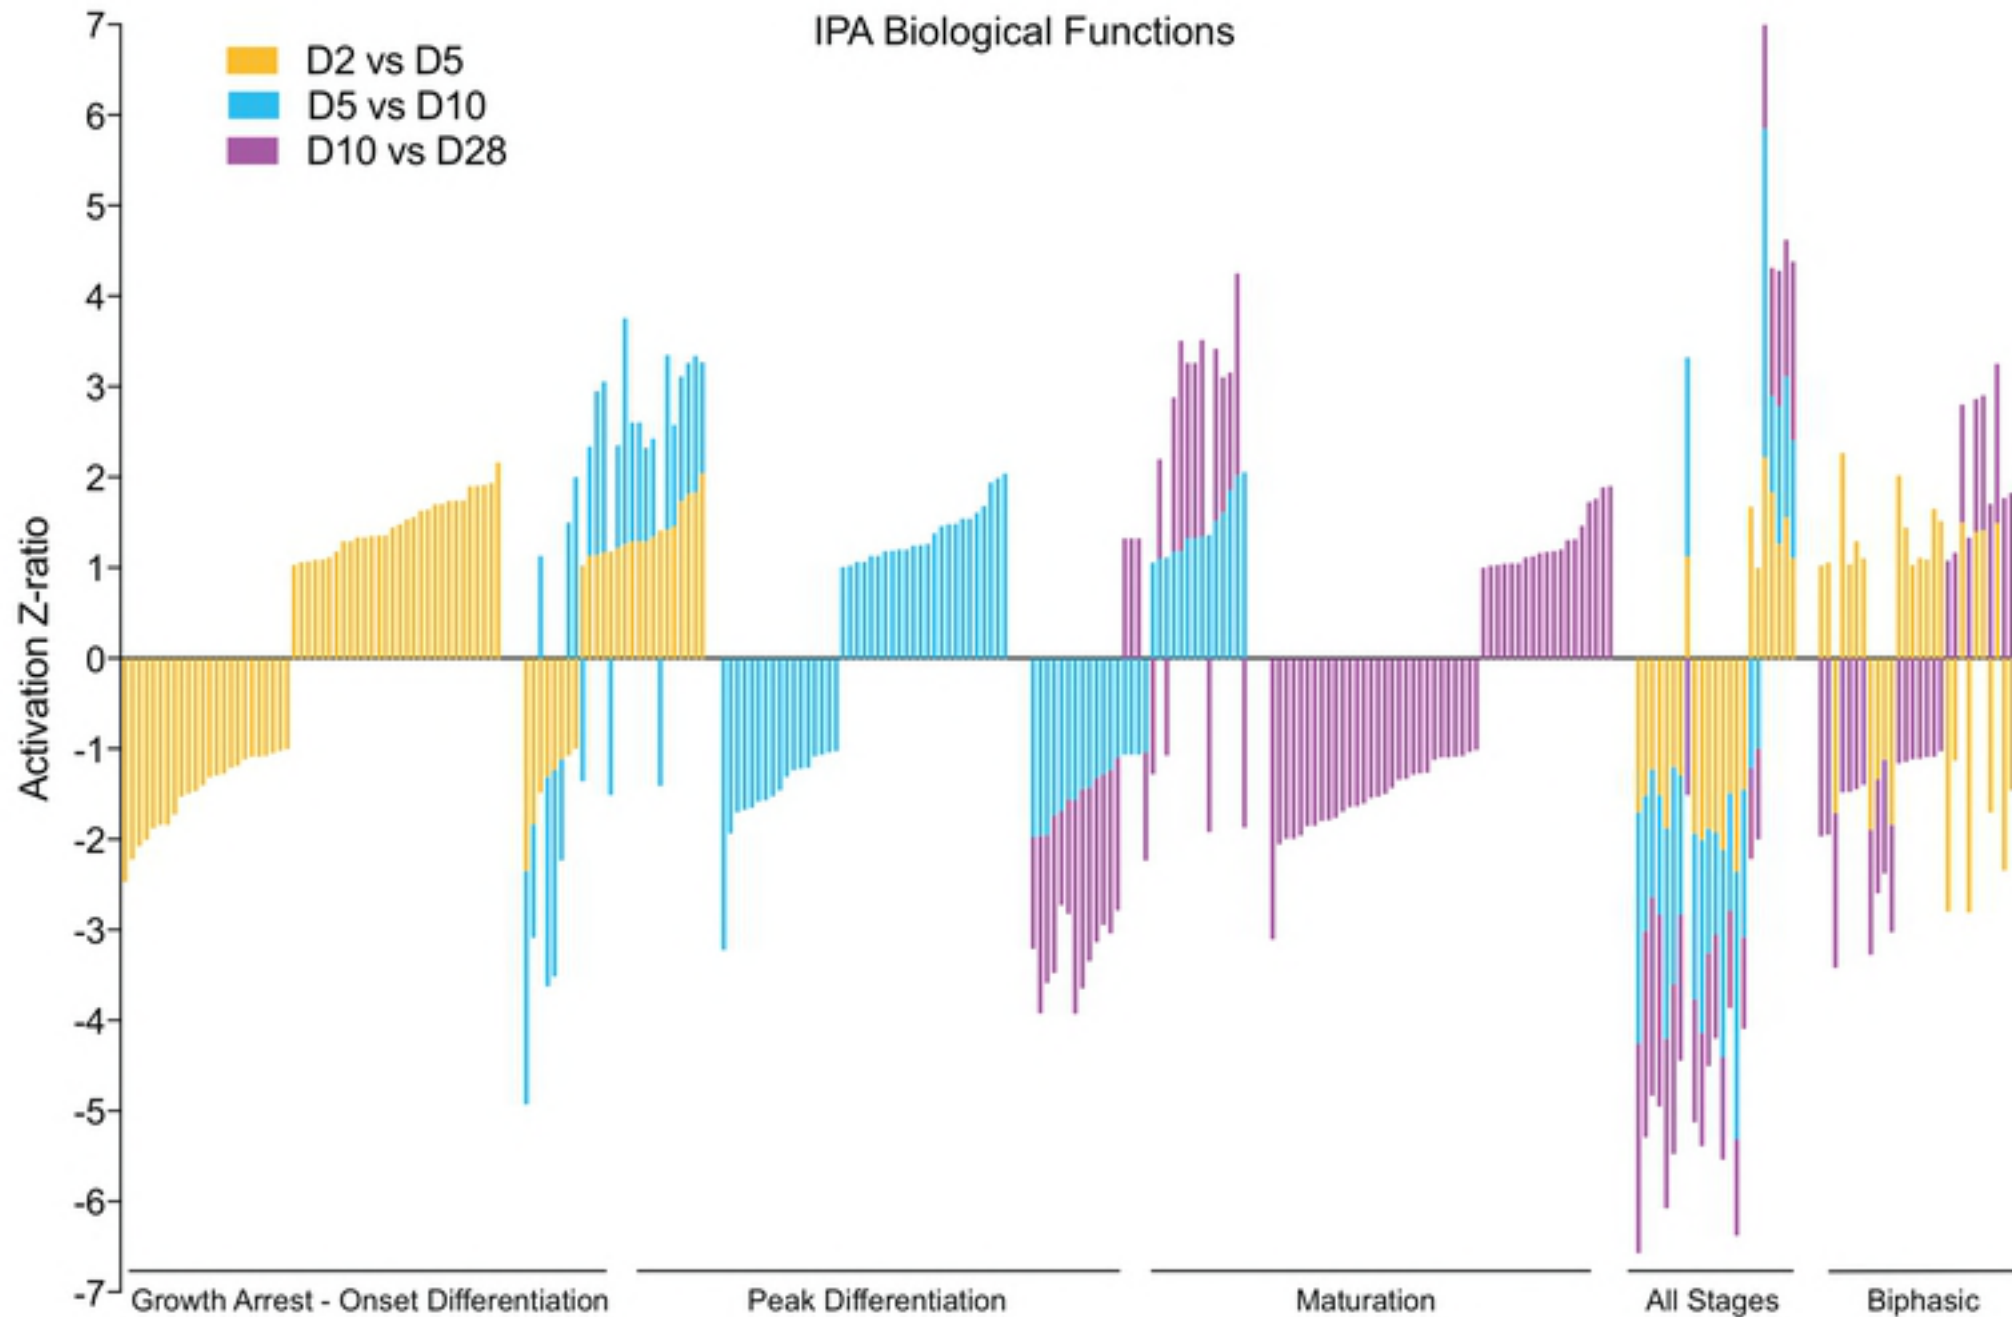

## A Upstream Regulators

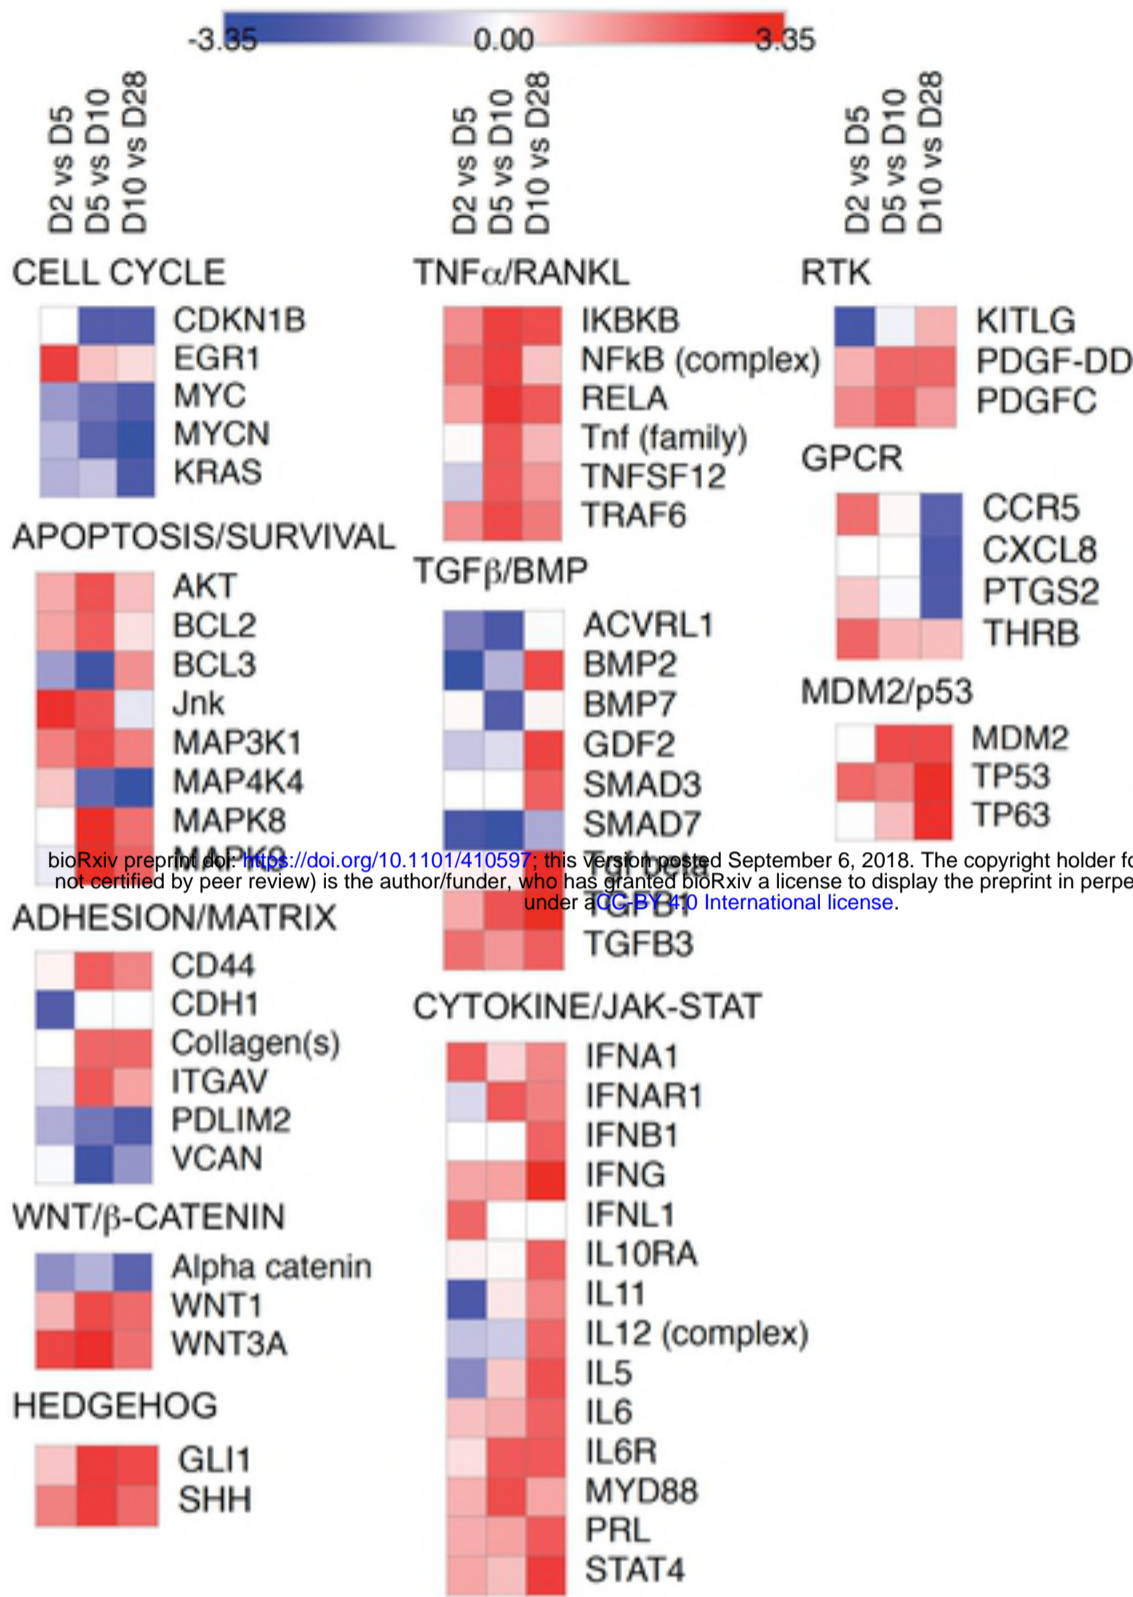

## B Canonical Pathways

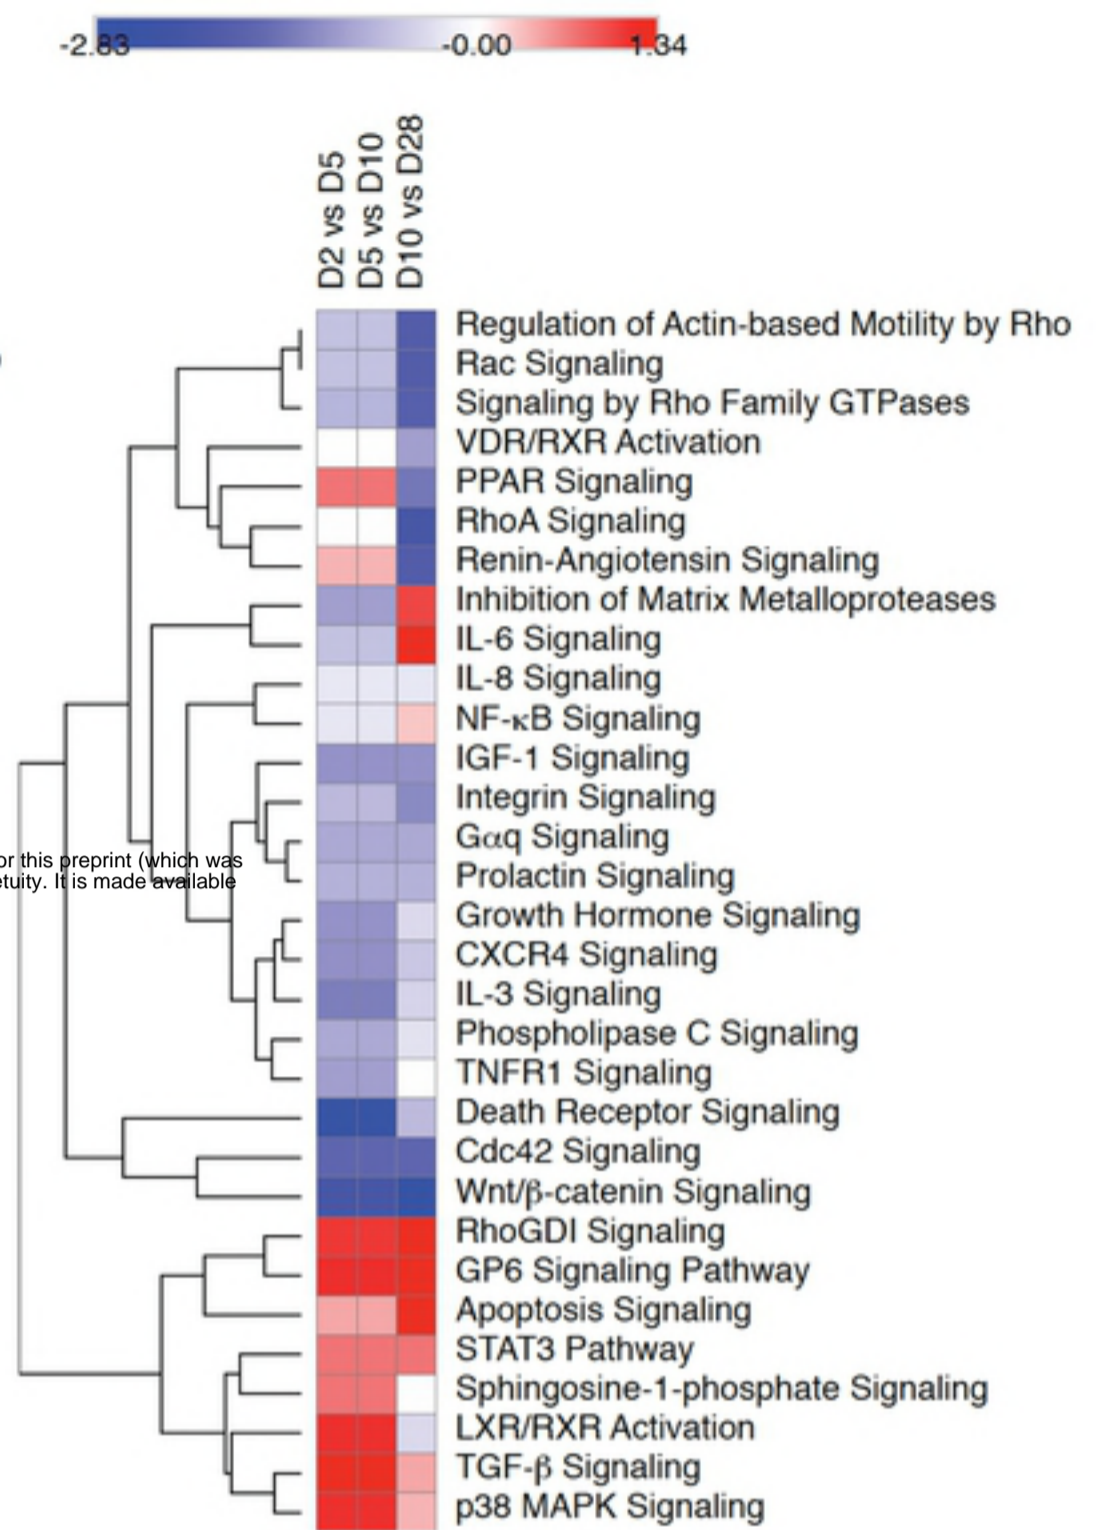

bioRxiv preprint doi: <https://doi.org/10.1101/410597>; this version posted September 6, 2018. The copyright holder for this preprint (which was not certified by peer review) is the author/funder, who has granted bioRxiv a license to display the preprint in perpetuity. It is made available under aCC-BY 4.0 International license.

## A Upstream Regulators

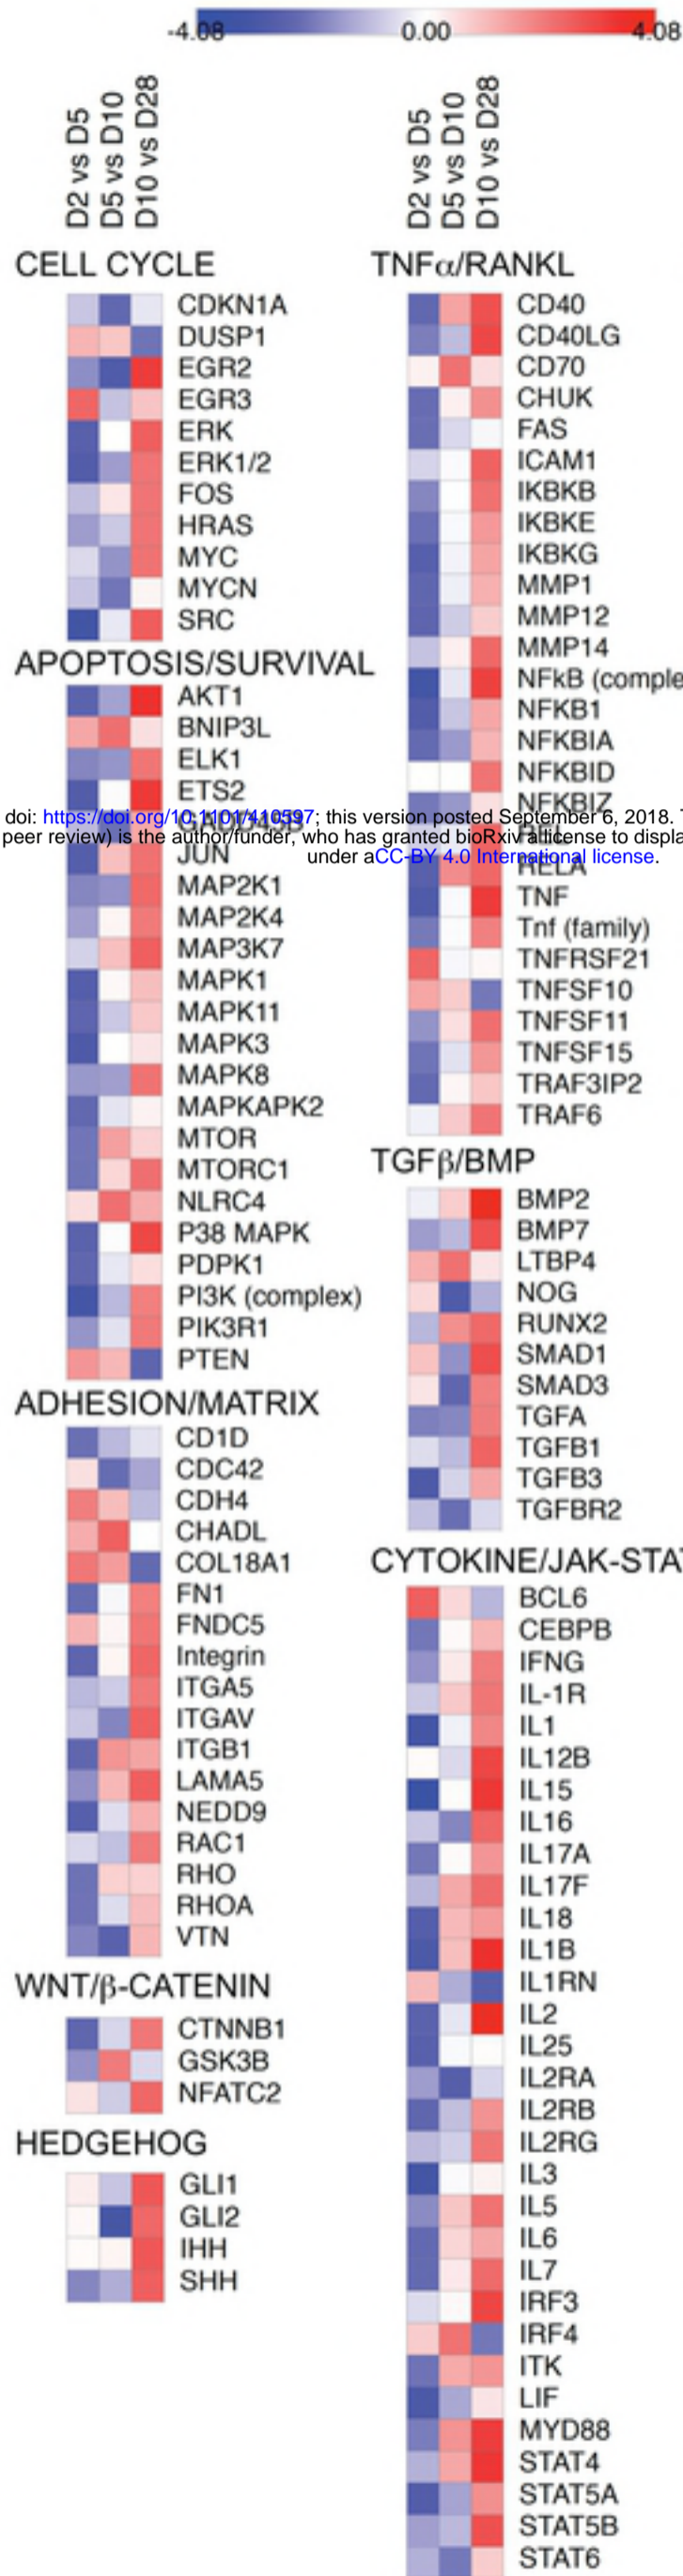

## B Canonical Pathways

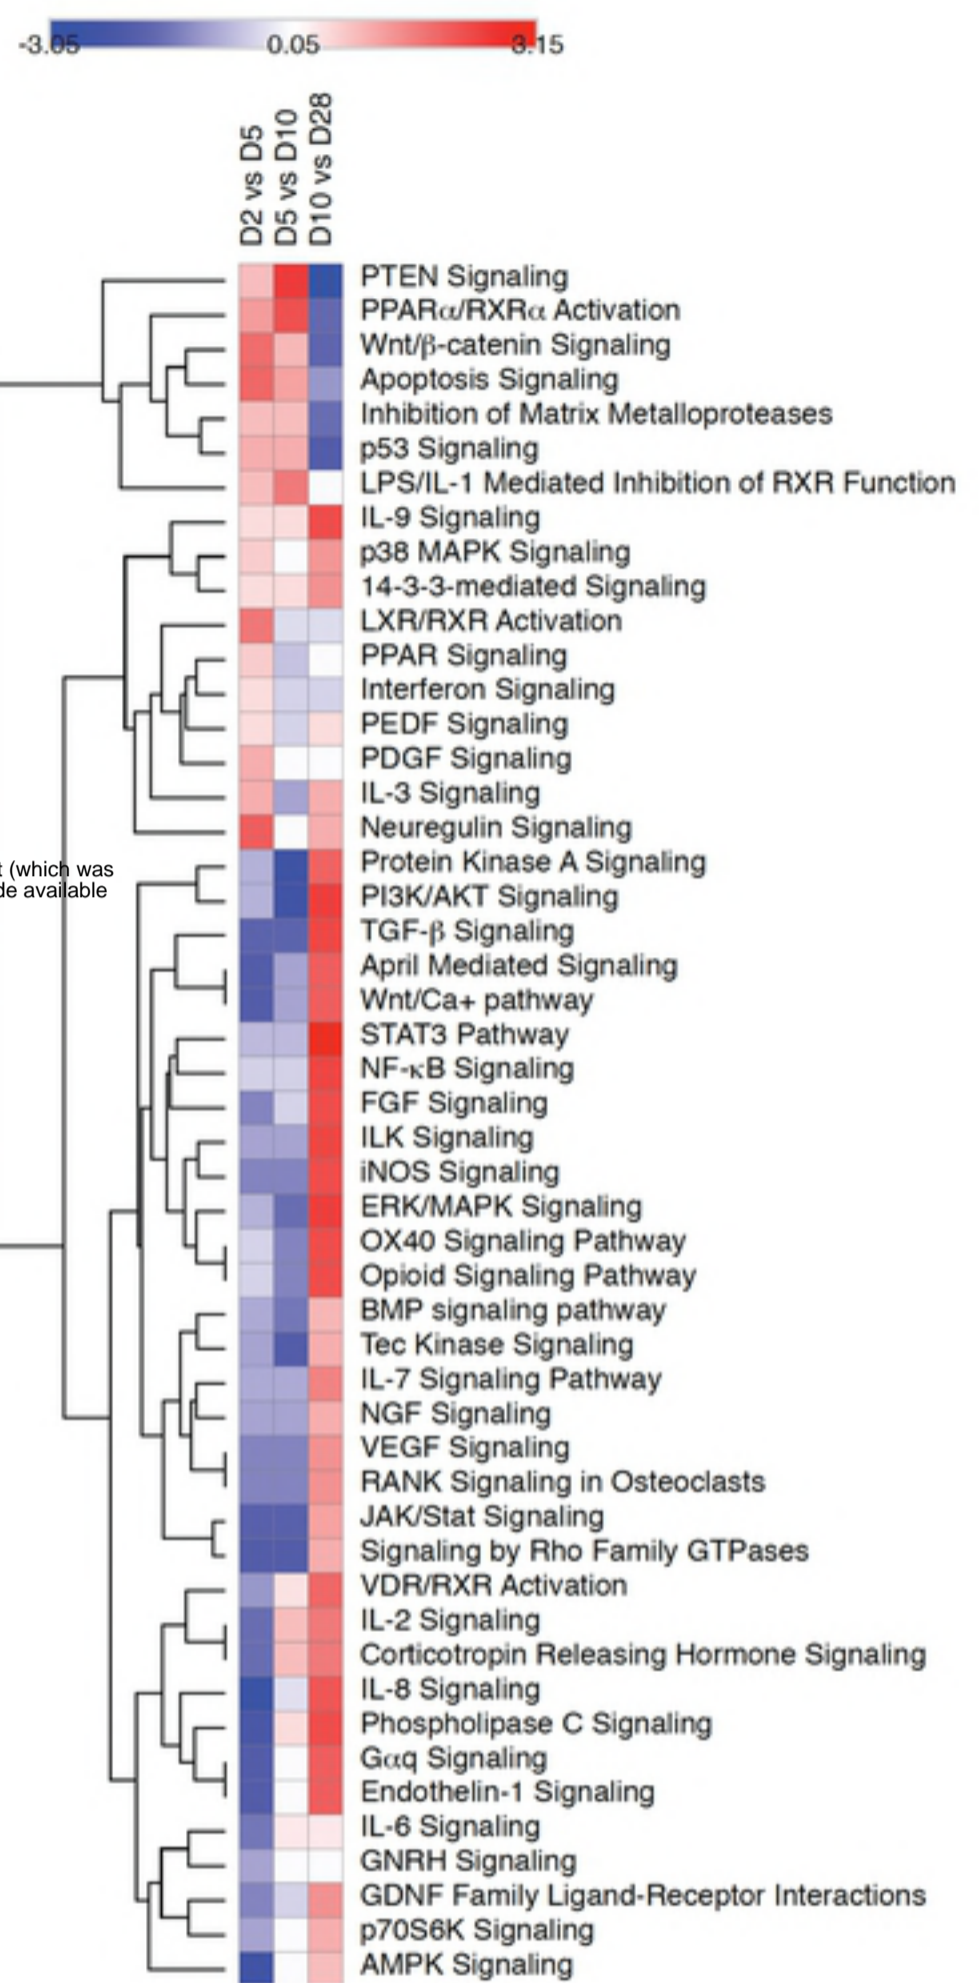

bioRxiv preprint doi: <https://doi.org/10.1101/410397>; this version posted September 6, 2018. The copyright holder for this preprint (which was not certified by peer review) is the author/funder, who has granted bioRxiv a license to display the preprint in perpetuity. It is made available under aCC-BY 4.0 International license.



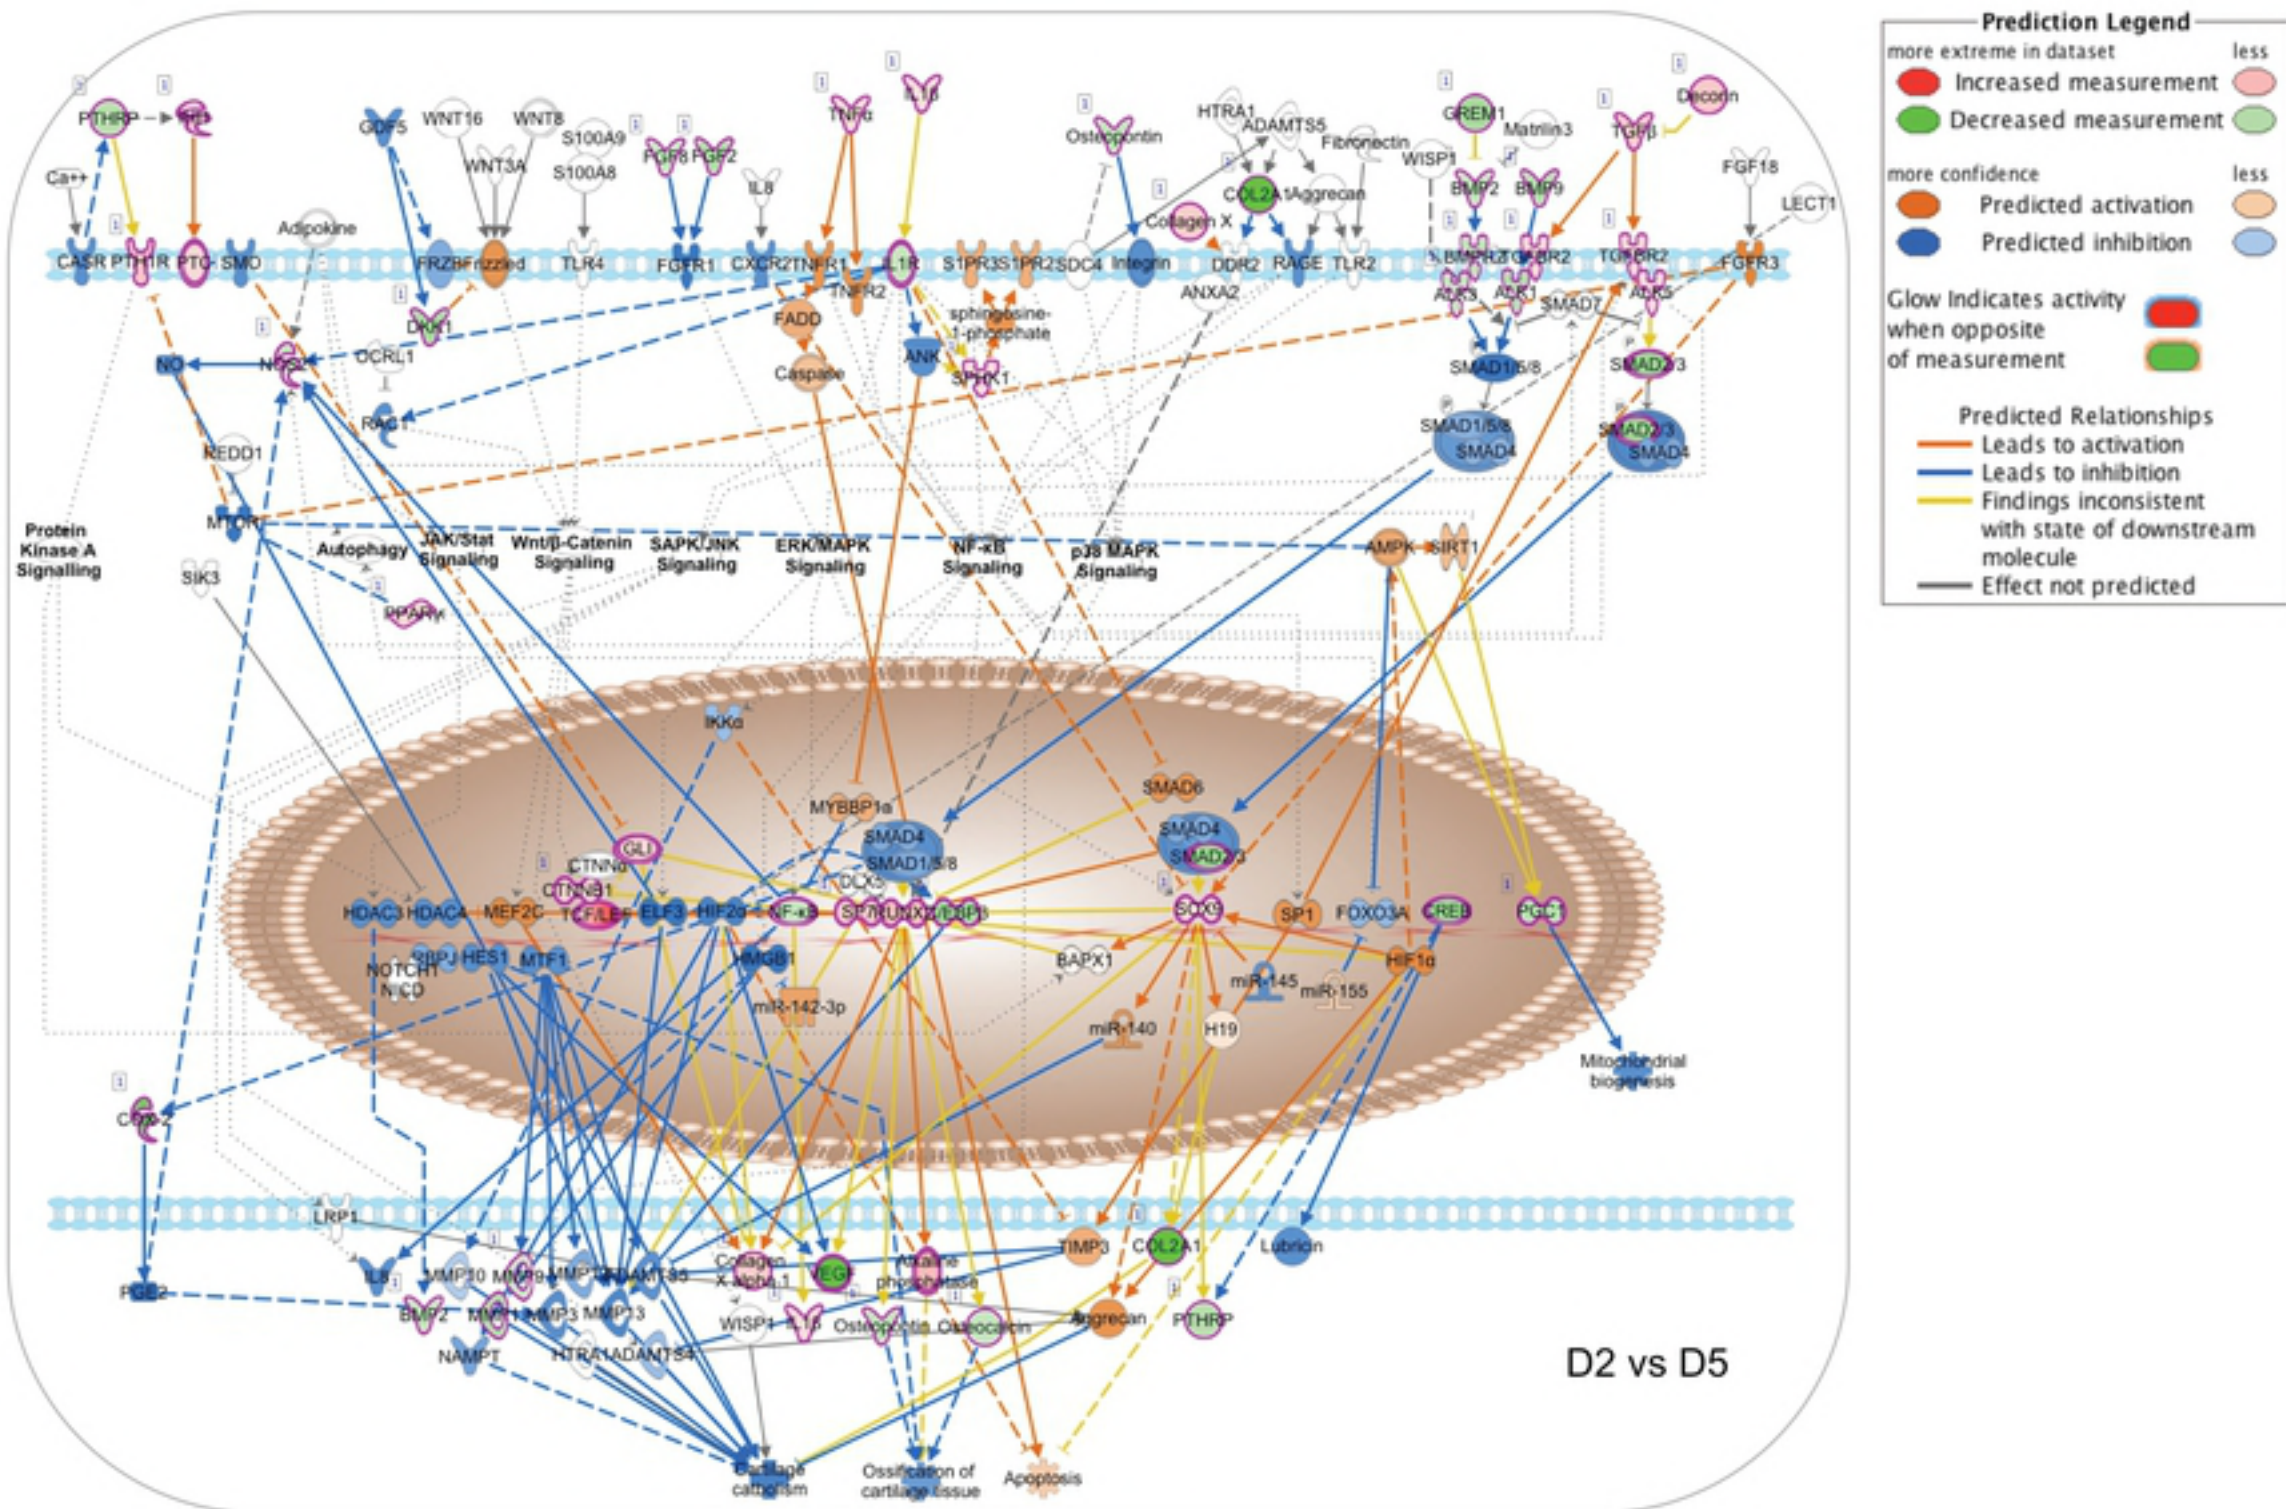

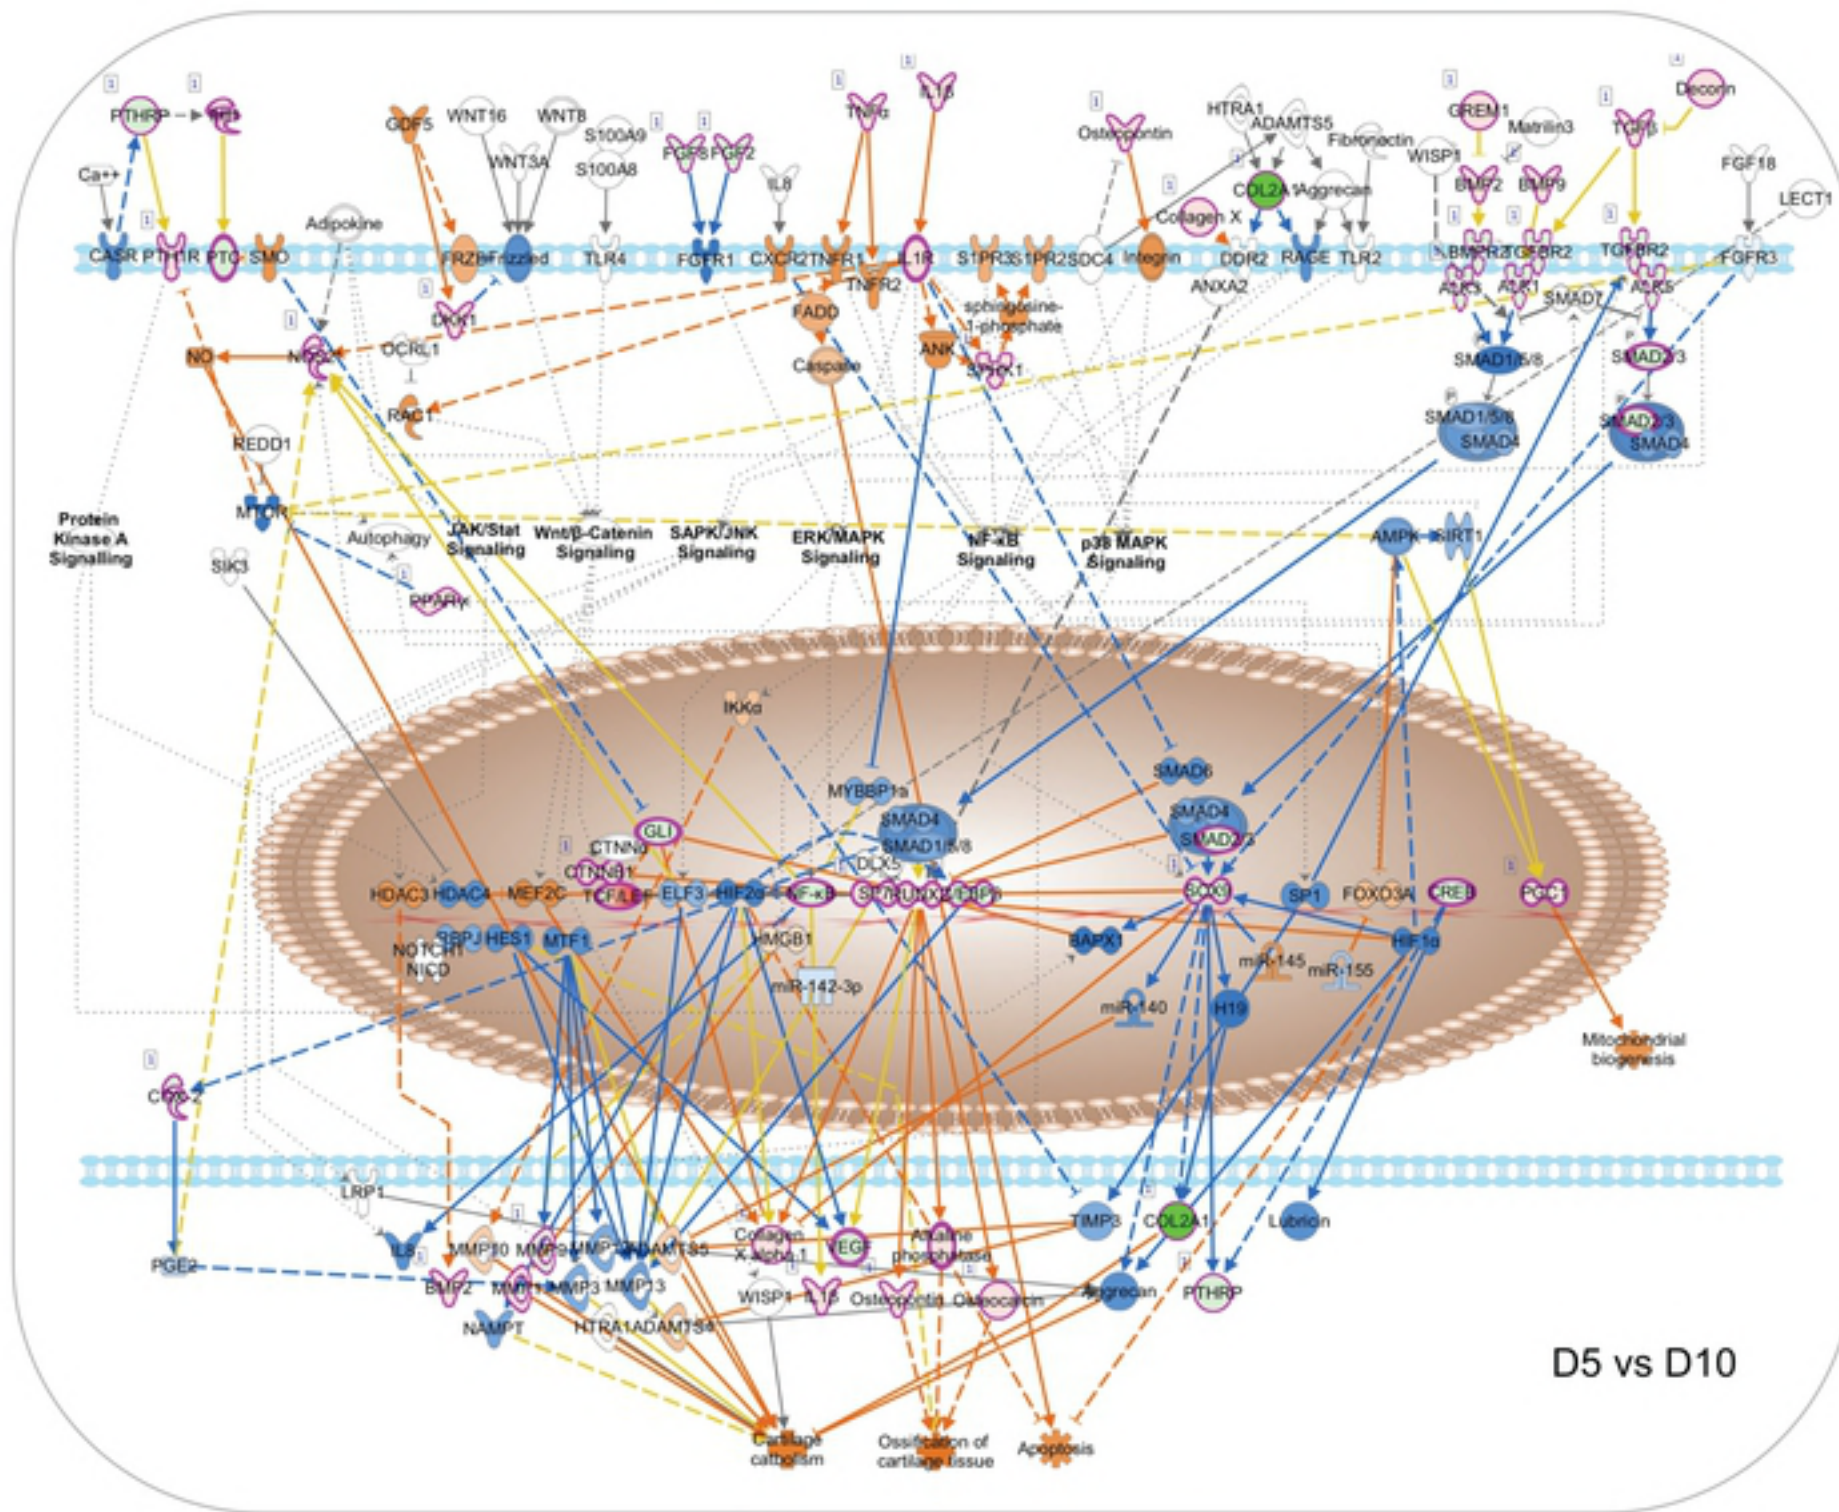

**Prediction Legend**

more extreme in dataset      less

● Increased measurement      ● Decreased measurement

more confidence      less

● Predicted activation      ● Predicted inhibition

● Predicted inhibition

Glow Indicates activity when opposite of measurement

**Predicted Relationships**

— Leads to activation

— Leads to inhibition

— Findings inconsistent with state of downstream molecule

— Effect not predicted

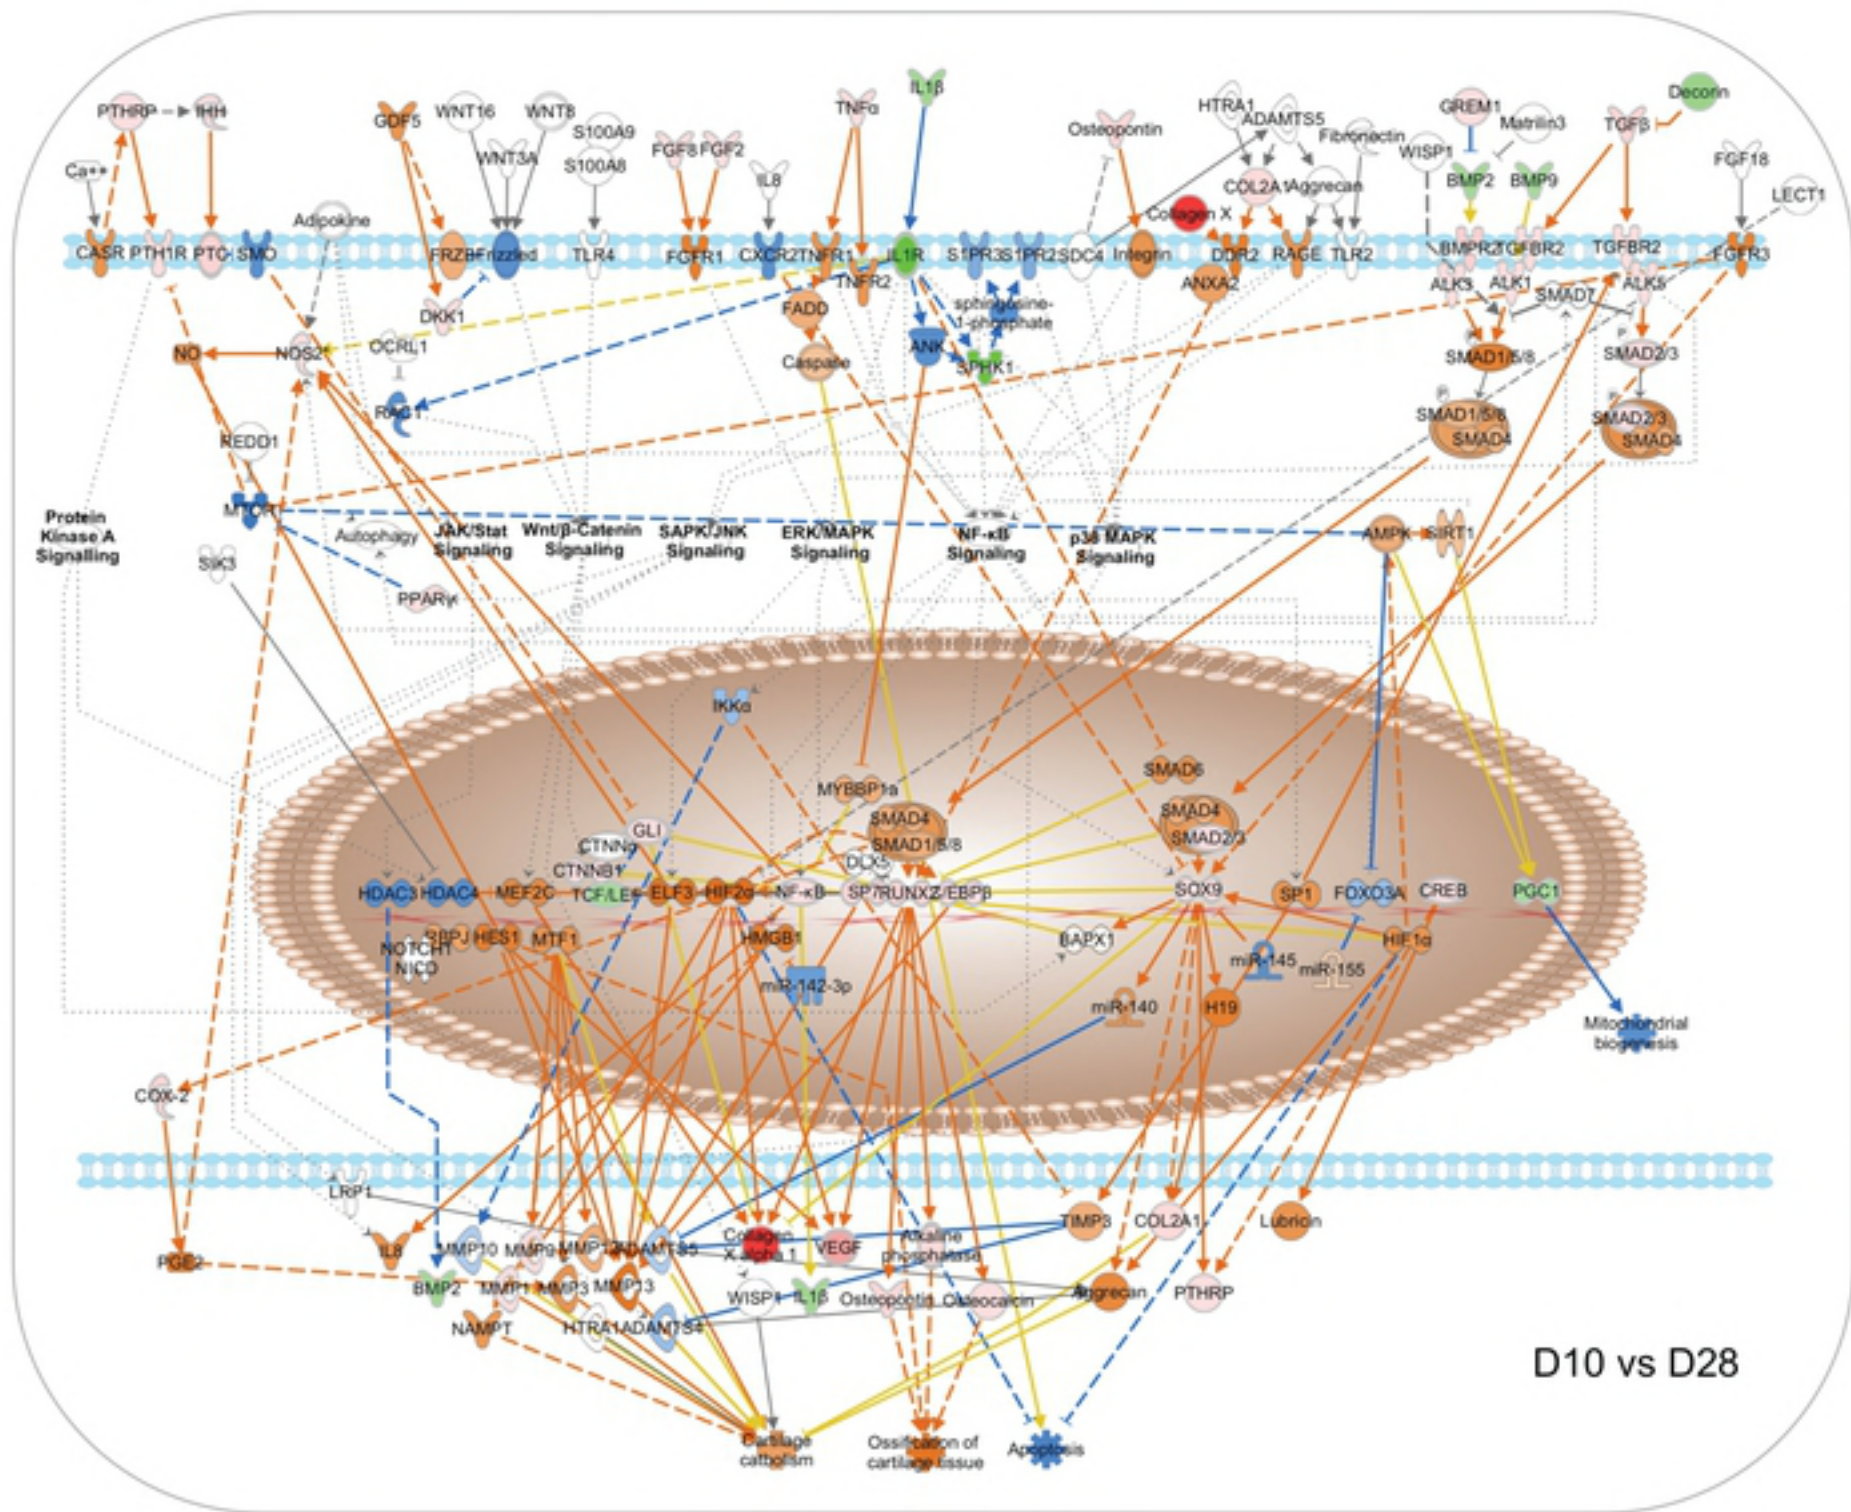

**Prediction Legend**

|                                                                         |                                      |
|-------------------------------------------------------------------------|--------------------------------------|
| more extreme in dataset                                                 | less                                 |
| Increased measurement (Red circle)                                      | Decreased measurement (Green circle) |
| more confidence                                                         | less                                 |
| Predicted activation (Orange line)                                      | Predicted inhibition (Blue line)     |
| Glow Indicates activity when opposite of measurement (Red/Green glow)   |                                      |
| <b>Predicted Relationships</b>                                          |                                      |
| — Leads to activation (Orange line)                                     |                                      |
| — Leads to inhibition (Blue line)                                       |                                      |
| — Findings inconsistent with state of downstream molecule (Yellow line) |                                      |
| — Effect not predicted (Black line)                                     |                                      |

D10 vs D28

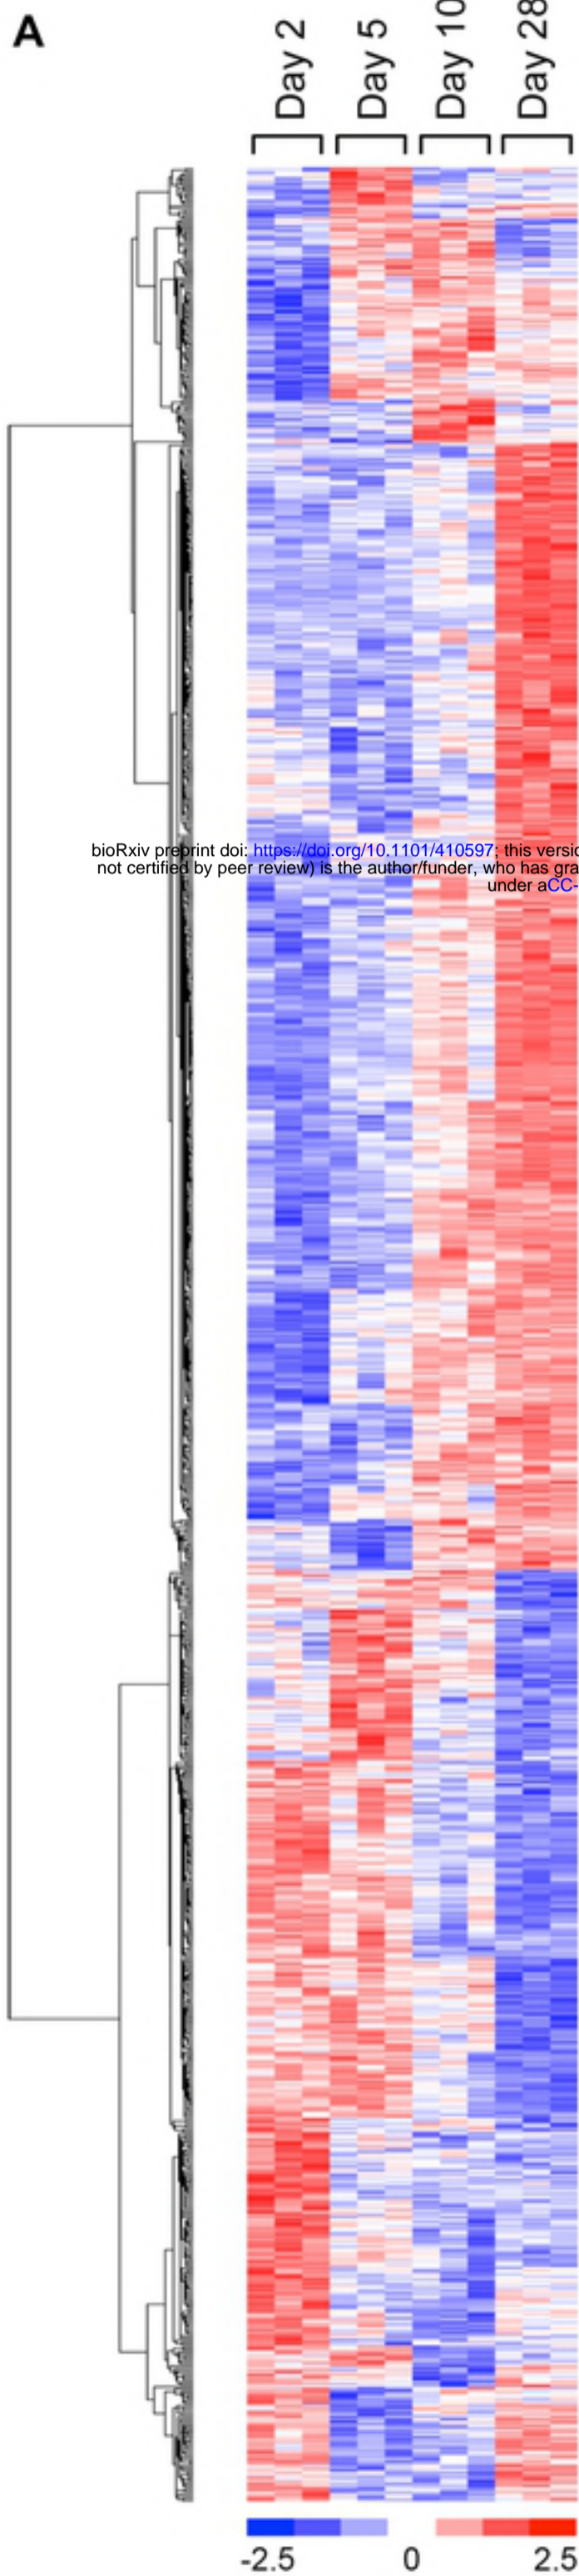

bioRxiv preprint doi: <https://doi.org/10.1101/410597>; this version posted September 6, 2018. The copyright holder for this preprint (which was not certified by peer review) is the author/funder, who has granted bioRxiv a license to display the preprint in perpetuity. It is made available under aCC-BY 4.0 International license.

**B** Self Organizing Matrix - ANOVA  $p < 0.005$  (1005 genes; FDR  $\sim 8.8\%$ )

Growth Arrest (240 genes)

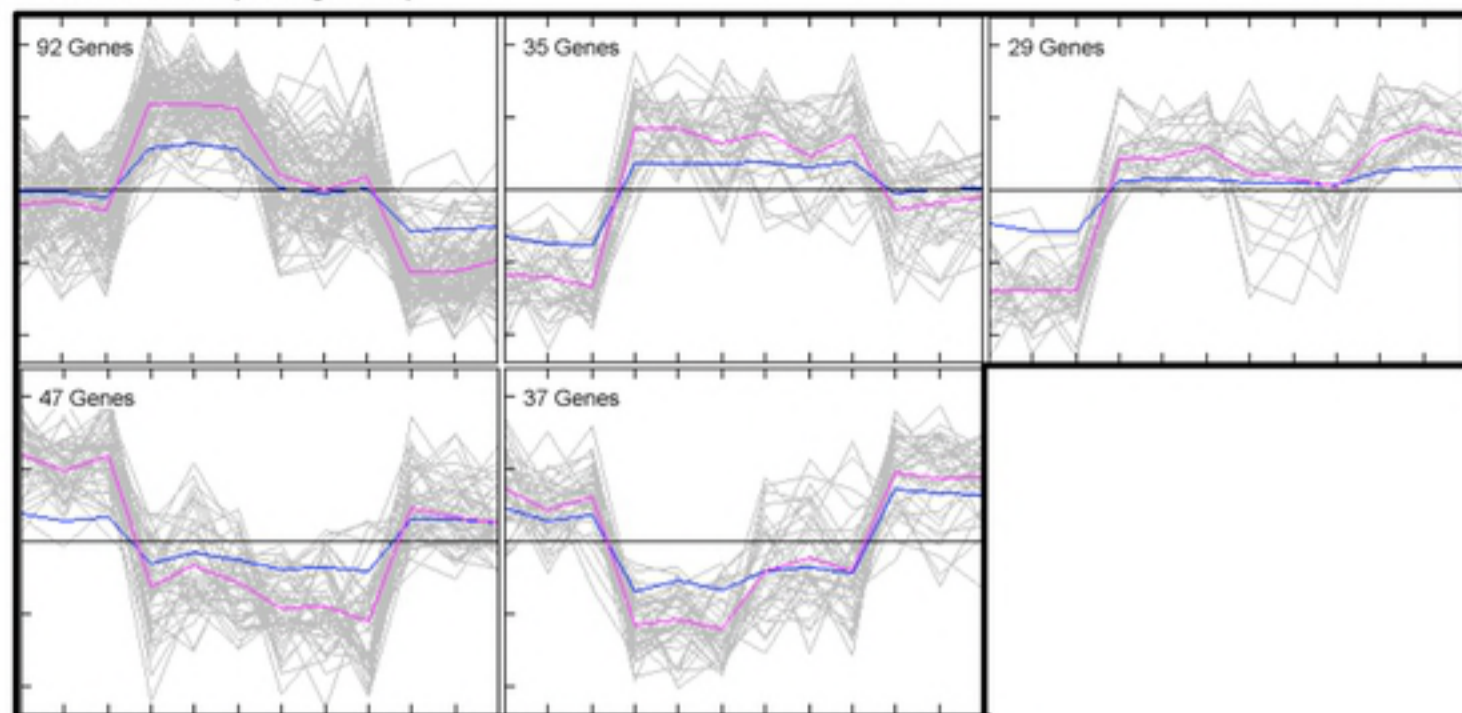

Onset Differentiation (212 genes)

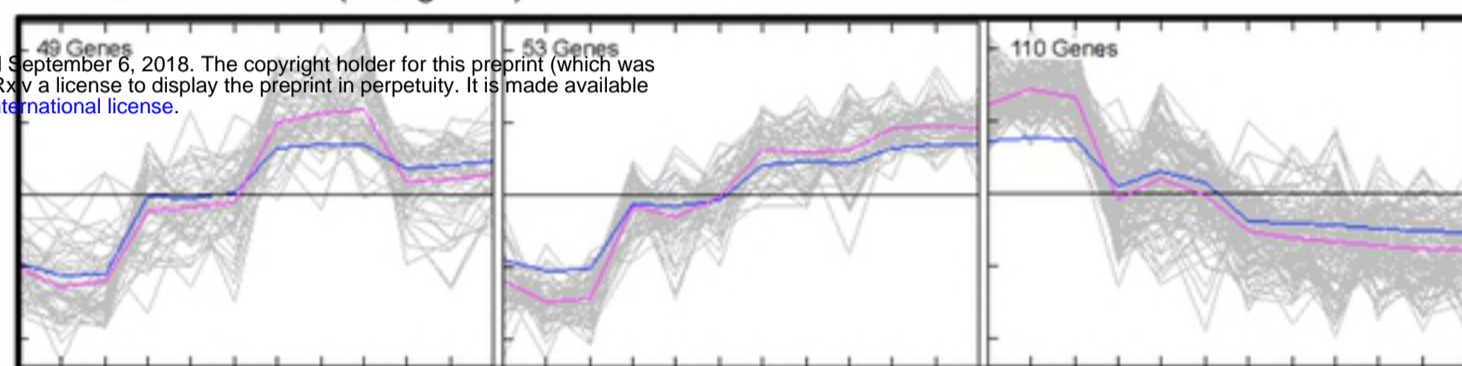

Peak Differentiation (246 genes)

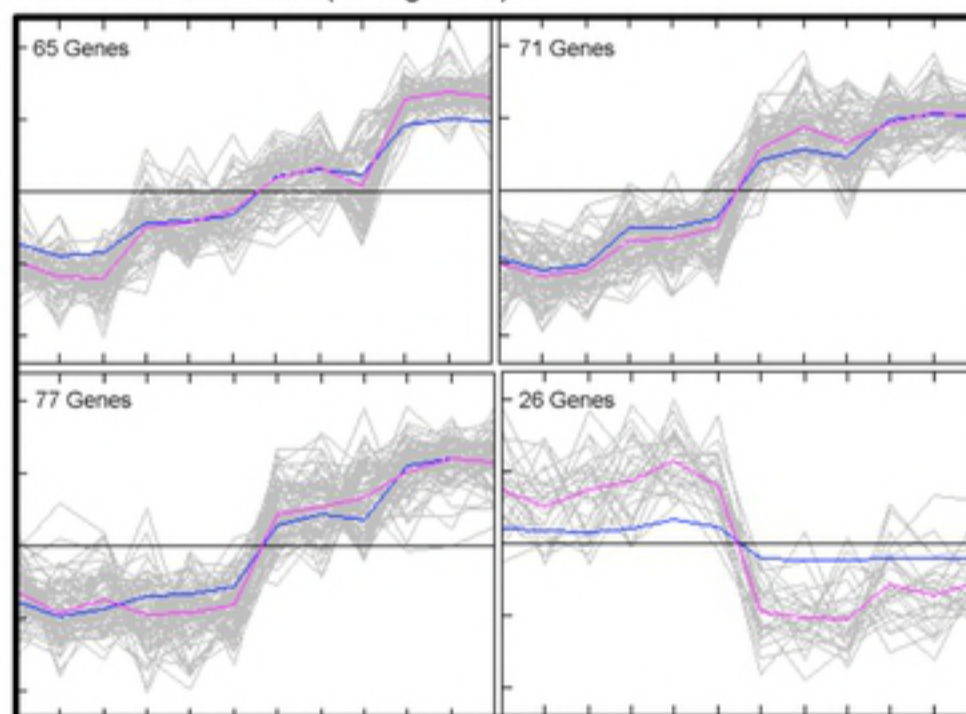

Maturation (307 genes)

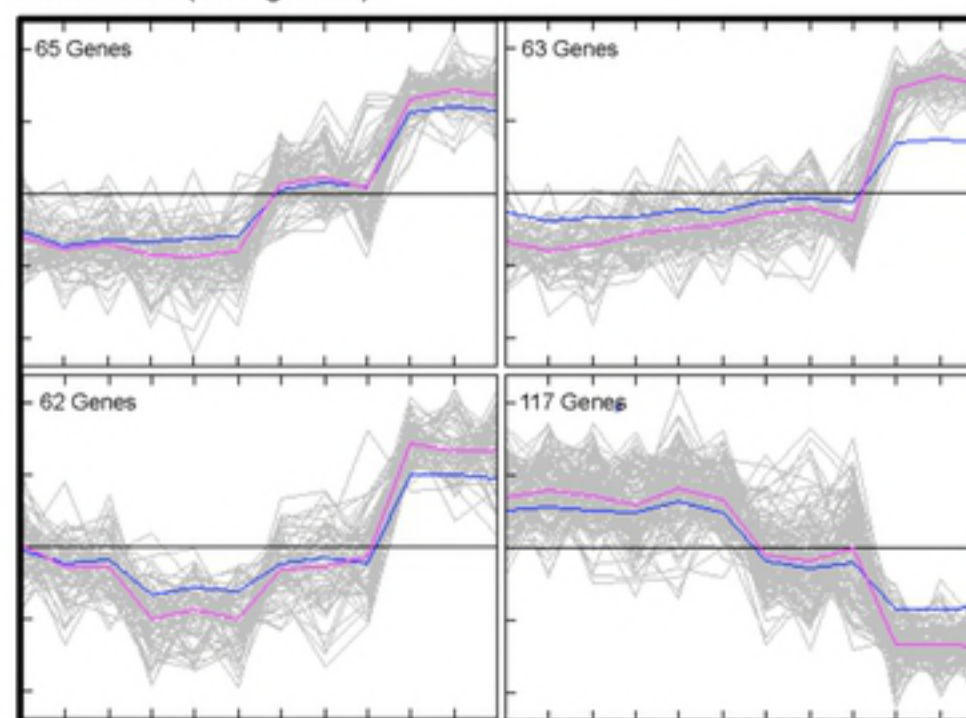

**A** NanoString Raw DataRow Min  Row Max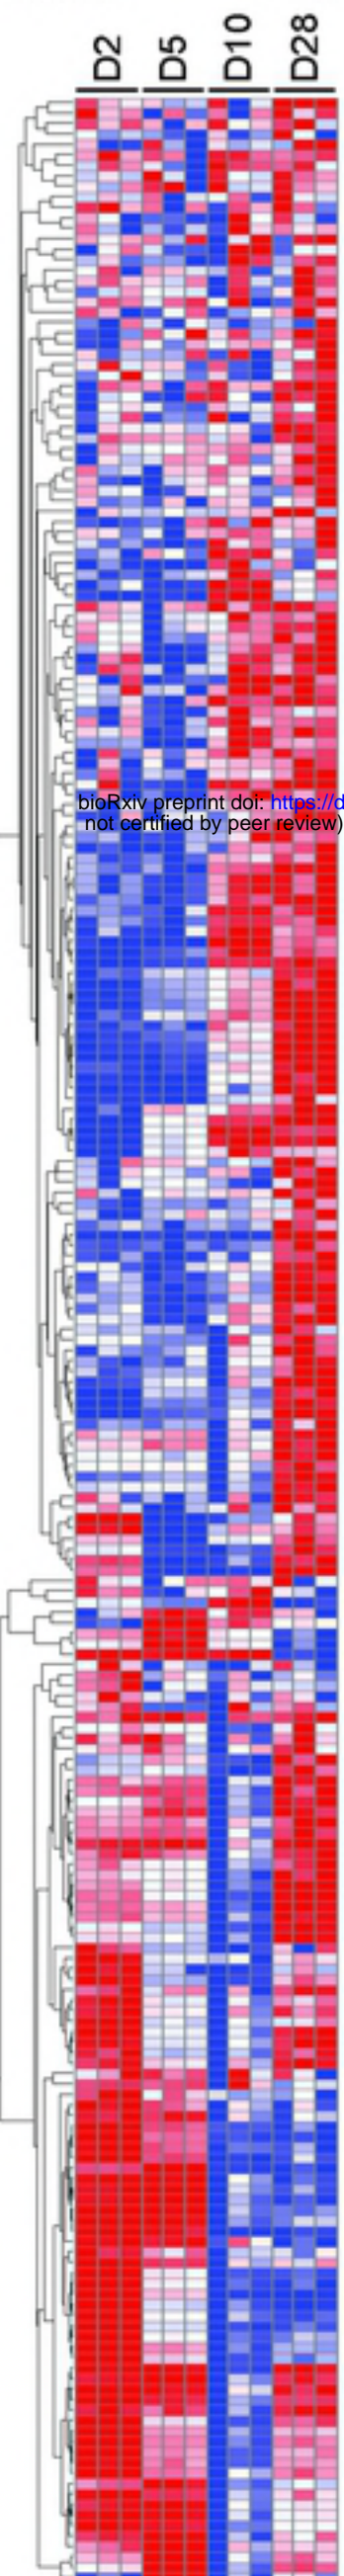**B** BMP Signaling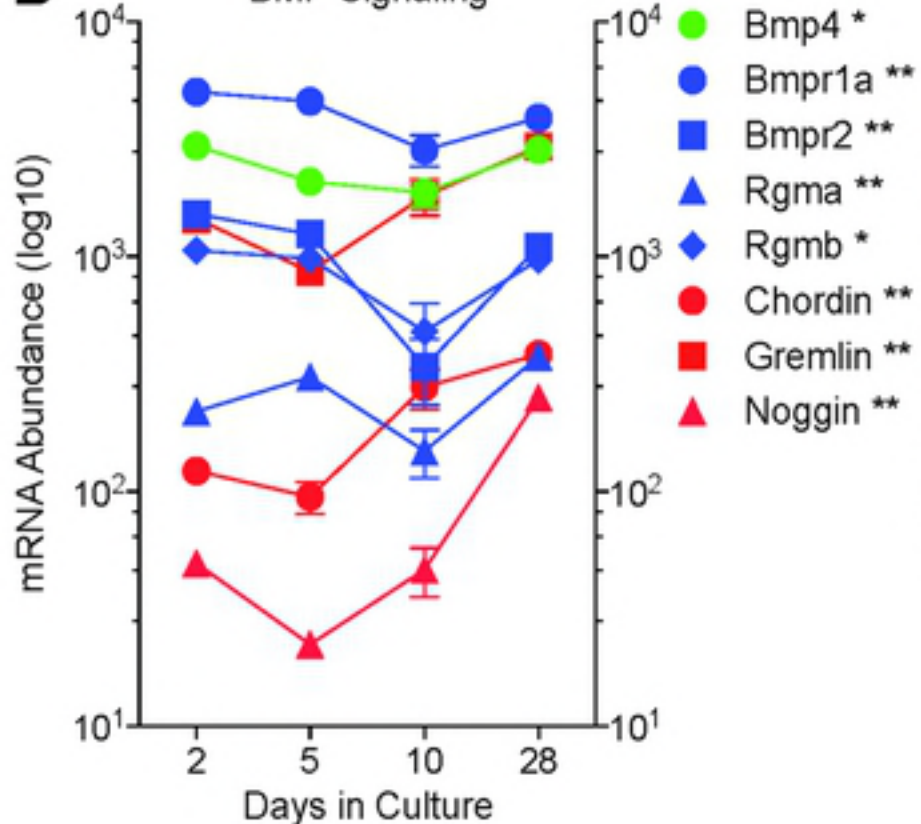**C** TNF $\alpha$  NF $\kappa$ B Signaling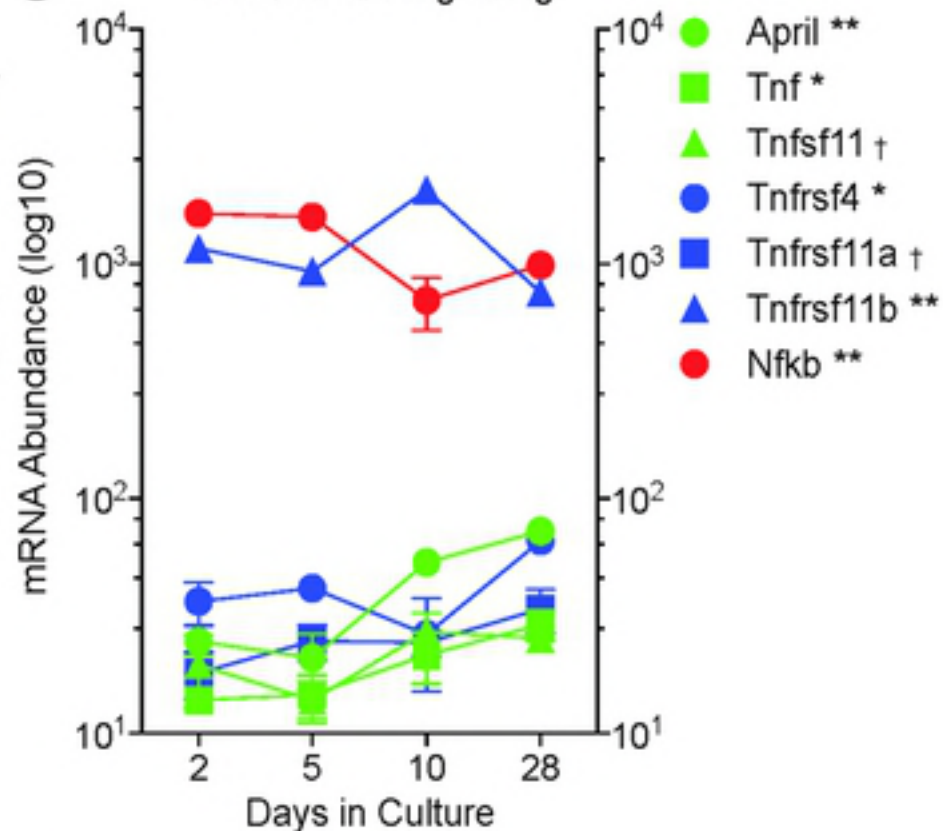**D** TGF $\beta$  Signaling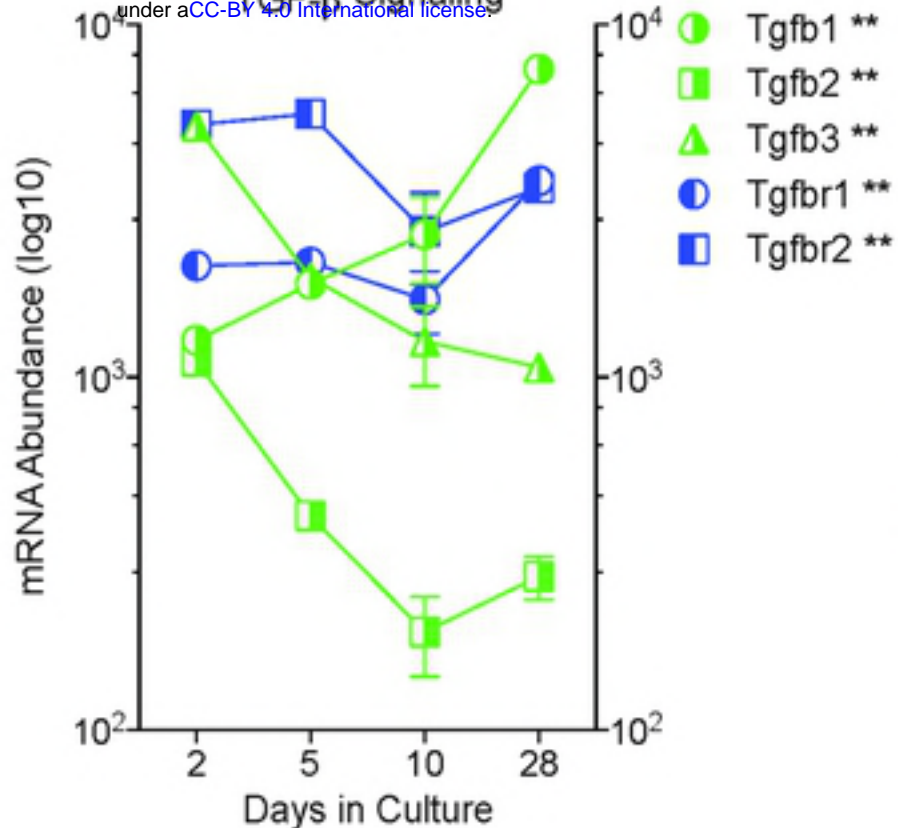**E** Cytokine JAK-STAT Signaling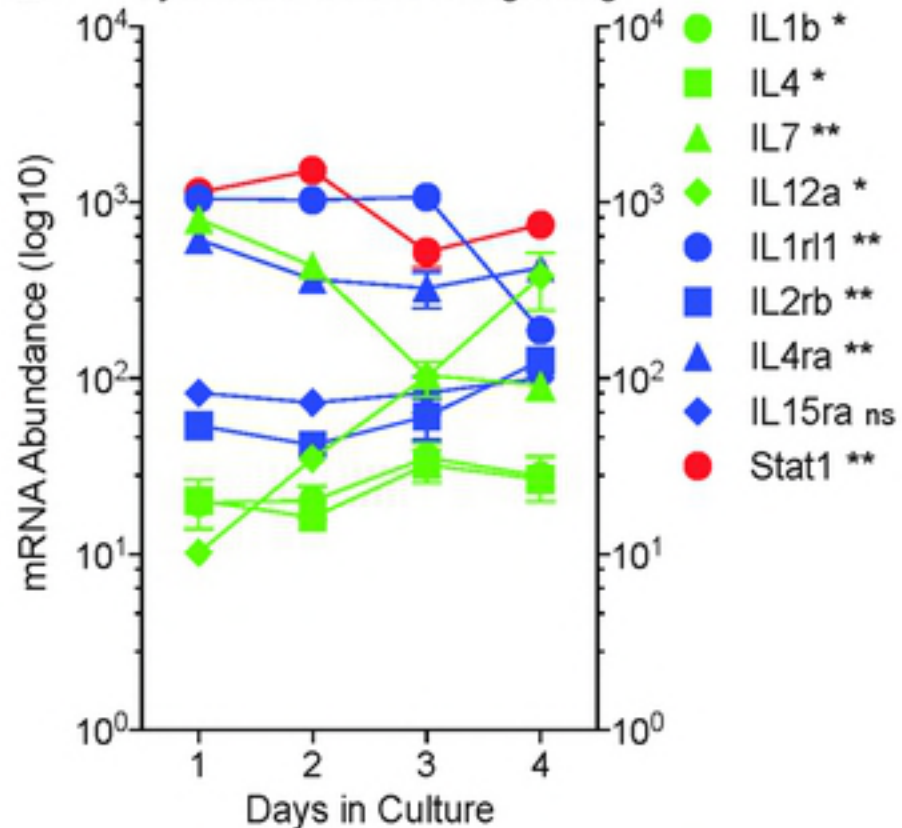**F** Activin Signaling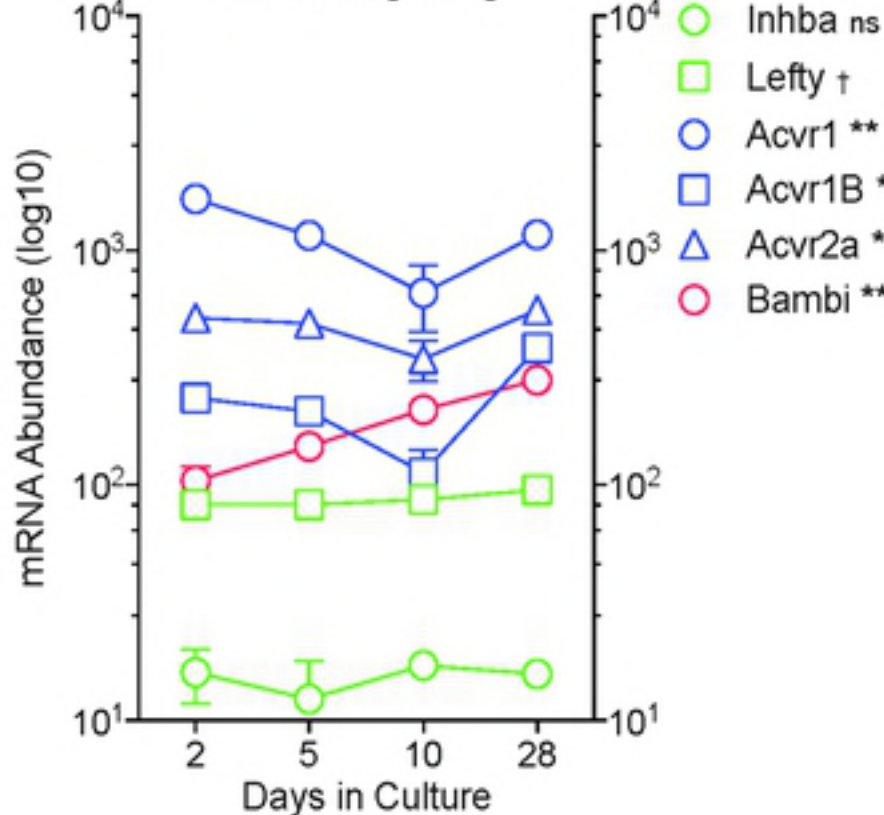**G** WNT  $\beta$ -Catenin Signaling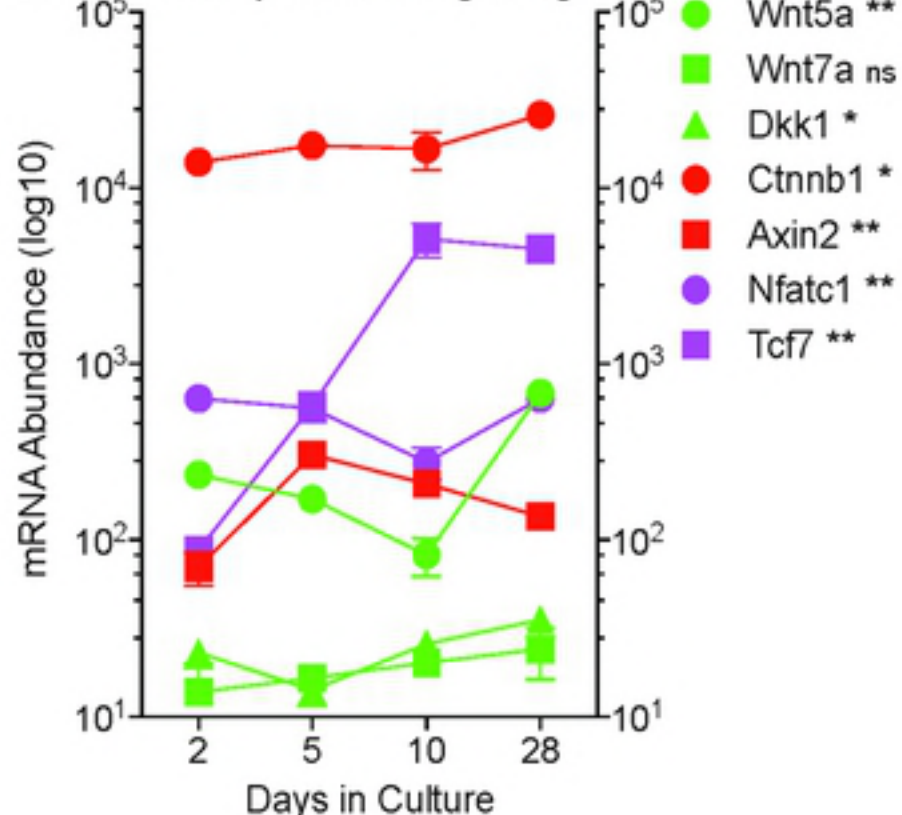

bioRxiv preprint doi: <https://doi.org/10.1101/410597>; this version posted September 6, 2018. The copyright holder for this preprint (which was not certified by peer review) is the author/funder, who has granted bioRxiv a license to display the preprint in perpetuity. It is made available under aCC-BY 4.0 International license.
